# 1 Title Page

2

## 3 Prediction of Overall Patient Characteristics that Incorporate Multiple Outcomes in 4 Acute Stroke: Latent Class Analysis

5

6 **Short Title:** Prediction of Overall Patient Characteristics

7

8 Junya Uchida, OT<sup>1,2†</sup>, BS (co-first author); Moeka Yamada OT<sup>1,3†</sup>, BS (co-first author);

9 Hirofumi Nagayama, OT, PhD<sup>1\*†</sup> (co-first author); Kounosuke Tomori, OT, PhD<sup>4</sup>; Kohei

10 Ikeda, OT, PhD<sup>1</sup>; Keita Yamauchi MD, PhD<sup>5</sup>

11

12 <sup>1</sup>Department of Occupational Therapy, Kanagawa University of Human Services,

13 Yokosuka, Japan

14 <sup>2</sup>Department of Rehabilitation Therapy, Saiseikai Higashikanagawa Rehabilitation

15 Hospital, Yokohama, Japan

16 <sup>3</sup>Department of Occupational Therapy, Shinyokohama Rehabilitation Hospital, Yokohama,

17 Japan

18 <sup>4</sup>Department of Occupational Therapy, Tokyo University of Technology, Tokyo, Japan

19 <sup>5</sup>Graduate School of Health Management, Keio University, Fujisawa, Japan

20

21 <sup>†</sup>These authors contributed equally to this work.

22

23    **\*Corresponding Author:**

24    Hirofumi Nagayama

25    Department of Occupational Therapy, Kanagawa University of Human Services,

26    1-10-1 Heiseicho, Yokosuka, Kanagawa, 238-8522 Japan

27    Tel: +81-46-828-2724

28    Fax: +81-46-828-2725

29    E-mail: hirofuminagayama@gmail.com

30

31    **Word Count:** 6,015 words

32

33

34

## 35 Abstract

36 **Background:** Previous prediction models have predicted a single outcome (e.g. gait) from  
37 several patient characteristics at one point (e.g. on admission). However, in clinical practice,  
38 it is important to predict an overall patient characteristic by incorporating multiple outcomes.  
39 This study aimed to develop a prediction model of overall patient characteristics in acute  
40 stroke patients using latent class analysis.

41 **Methods:** This retrospective observational study analyzed stroke patients admitted to acute  
42 care hospitals (37 hospitals, N=10,270) between January 2005 and March 2016 from the  
43 Japan Association of Rehabilitation Database. Overall, 6,881 patients were classified into  
44 latent classes based on their outcomes. The prediction model was developed based on patient  
45 characteristics and functional ability at admission. We selected the following outcome  
46 variables at discharge for classification using latent class analysis: Functional Independence  
47 Measure (functional abilities and cognitive functions), subscales of the National Institutes of  
48 Health Stroke Scale (upper extremity function), length of hospital stay, and discharge  
49 destination. The predictor variables were age, Functional Independence Measure (functional  
50 abilities and comprehension), subscales of the National Institutes of Health Stroke Scale  
51 (upper extremity function), stroke type, and amount of rehabilitation (physical, occupational,  
52 and speech therapies) per day during hospitalization.

53 **Results:** Patients (N=6,881) were classified into nine classes based on latent class analysis  
54 regarding patient characteristics at discharge (class size: 4–29%). Class 1 was the mildest  
55 (shorter stay and highest possibility of home discharge), and Class 2 was the most severe  
56 (longer stay and the highest possibility of transfers including deaths). Different gradations  
57 characterized Classes 3–9; these patient characteristics were clinically acceptable. Predictor  
58 variables at admission that predicted class membership were significant (odds ratio: 0.0–  
59 107.9,  $P<.001$ ).

60 **Conclusions:** Based on these findings, the model developed in this study could predict an  
 61 overall patient characteristic combining multiple outcomes, helping determine the appropriate  
 62 rehabilitation intensity. In actual clinical practice, internal and external validation is required.

63

64

## 65 **Non-standard Abbreviations and Acronyms**

66 ADLs; activities of daily living

67 LCA; latent class analysis

68 FIM; Functional Independence Measure

69 NIHSS; National Institutes of Health Stroke Scale

## 70 Introduction

71 Annually, 15 million people worldwide suffer from stroke, resulting in five million deaths  
 72 and five million developing stroke-related disabilities.<sup>1)</sup> Rehabilitation services are included  
 73 as the indispensable mechanism that encourages functional recovery and independence in  
 74 acute stroke patients.<sup>2)</sup> A formal assessment of activities of daily living (ADLs), instrumental  
 75 ADLs, communication abilities, and functional mobility is recommended for the  
 76 rehabilitation of stroke patients before discharge. The findings should be incorporated into the  
 77 care transition and discharge planning process.<sup>2, 3)</sup> In addition, when considering a discharge  
 78 destination from the acute setting, clinicians consider a patient's prognosis of functional  
 79 recovery as the most critical factor.<sup>4, 5)</sup> Therefore, predicting a patient's condition at discharge  
 80 based on the assessment results at admission can provide a valuable contribution to  
 81 personalized rehabilitation plans.

82 A recent review<sup>6)</sup> reported that several tools had been developed to predict the outcomes for  
 83 independence,<sup>7-9)</sup> upper extremity function,<sup>10, 11)</sup> gait,<sup>12-17)</sup> and swallowing.<sup>18, 19)</sup> These  
 84 previous studies have predicted a single outcome based on multiple variables. However, from  
 85 a clinical perspective, it is crucial to predict overall patient characteristics, incorporating  
 86 multiple outcomes at discharge, not just a single outcome. Overall patient characteristics  
 87 might be, for example, a patient is expected to be able to walk independently but may need  
 88 assistance with communication and cognitive function. Despite the importance of predicting  
 89 overall patient characteristics, previous studies have not developed such a comprehensive  
 90 prediction model, leaving the problem unresolved. Therefore, developing a prediction model  
 91 of overall patient characteristics at discharge in acute stroke patients will provide a new  
 92 solution to a problem previous prediction models have not solved.

93 We employed latent class analysis (LCA) to solve these problems. LCA is a subset of  
 94 structural equation modeling that categorizes heterogeneous classes (segments) from the

study population by associating manifest variables with notions (latent variables) that cannot be directly measured.<sup>20)</sup> LCA is useful when differences in the underlying distributions among variables contribute to heterogeneity within a study population.<sup>21)</sup> Using LCA, it is possible to identify classes of overall patient characteristics (such as discharge destination, physical function, functional abilities, and length of stay) at discharge and to develop a model that predicts which class the patient belongs based on their characteristics at admission. Therefore, this study aimed to develop a prediction model of overall patient characteristics in acute stroke patients using LCA. This prediction model has the potential to predict conventional functional status and determine appropriate rehabilitation intensity levels (amount of rehabilitation per day) for individual patients.

## Methods

We conducted a retrospective observational study using the Japan Association of Rehabilitation Database.<sup>22, 23)</sup> The need for informed consent was waived because all data were de-identified. The study was approved by the ethics committee of the Kanagawa University of Human Services (No. 7-20-30).

## Database

Data from the Japan Association of Rehabilitation Database, voluntarily sampled from patients admitted to participating hospitals between January 2005 and March 2016,<sup>22-24)</sup> were obtained retrospectively. The data were separated into different categories based on the diagnosis and stage, such as stroke in the medical ward, stroke in the convalescent rehabilitation ward, and other conditions. The National Institutes of Health Stroke Scale (NIHSS) and Functional Independence Measure (FIM) scores, patient age, stroke type,

severity, rehabilitation type, and rehabilitation length are all recorded in the stroke database.  
Data from 33,657 patients were collected in 2016, when 80 hospitals participated in the study.  
All data gathered on stroke patients admitted to acute care hospitals (37 hospitals, N=10,270)  
between the time of admission and discharge were used in this study.

## ***Participants***

### ***Inclusion Criteria***

The inclusion criteria of this study were (1) patients with acute stroke admitted to registered hospitals in the Japan Association of Rehabilitation Database between 2005 and 2015, (2) those who were aged  $\geq 18$  years, and (3) those provided with rehabilitation (physical, occupational, and speech therapy).

### ***Exclusion Criteria***

The exclusion criteria were (1) no data on age at admission, (2) no data on the discharge destination, (3) age  $< 18$  years, (4) no rehabilitation provided during hospitalization, (5) duration from stroke onset to admission of  $> 7$  days, (6) rehabilitation for  $> 9$  units (180 min) a day during hospitalization, because, in the Japanese rehabilitation system, there is a limit of 9 units daily for rehabilitation. Therefore, assuming that a patient receiving  $> 9$  units a day is undergoing a normal rehabilitation program is difficult. (7) length of stay of  $< 1$  day or  $> 179$  days, (8) no data on all of the items of the FIM and NIHSS at admission and/or discharge, and (9) no data on all of the items of the FIM both at admission and discharge.

### ***Outcome Variables at Discharge***

Based on previous studies and clinical perspectives, we selected the following outcome variables at discharge for classification using LCA: functional abilities, cognitive functions, upper extremity function, length of hospital stay, and discharge destination.

The FIM assessed functional abilities at discharge. The FIM includes 18 items to determine the amount of assistance for a person with a disability to perform daily activities safely and effectively.<sup>25)</sup> All items were scored using a 7-point scale: 1, total assistance; 2, maximum assistance; 3, moderate assistance; 4, minimal assistance; 5, supervision; 6, modified independence; and 7, complete independence. Based on previous studies,<sup>26, 27)</sup> we classified these seven scales into three groups: complete dependence (1–2), modified dependence (3–5), and independence (6–7). Outcome variables extracted as functional abilities were eating, transfer (bed/chair/wheelchair), toileting, locomotion (walk/wheelchair), and transfer (shower/bathtub).

Cognitive functions were also described referring to the cognitive subscale of the FIM. Three items of the FIM cognitive subscale were extracted: comprehension, expression, and social interaction. Social interaction was identified as a significant predictor of the post-rehabilitation destinations in acute stroke patients.<sup>28)</sup> Patients with deficits in comprehension could constitute serious problems in their homes despite the support of their families because they might not be able to understand the provided information.<sup>29)</sup>

The upper extremity function was collected from the score on the motor arm, one of the NIHSS subscales. The NIHSS is a scale highly widely used in modern neurology that rates deficits.<sup>30)</sup> The score of the motor arm is from 0 to 4. A high score on this item indicates severe impairment in the patient's upper extremities.

Length of hospital stay varies from patient to patient, depending on the stroke's severity, the patient's background influencing their discharge destination, and other factors. Therefore, it



was classified into the following four categories: 1–14 days, 15–28 days, 29–42 days, and  $\geq 43$  days.

Discharge destinations confirmed in the dataset were grouped into five groups: home, different hospitals, facilities, death, and others.

### ***Predictor Variables***

In this study, the predictor variables were the patient characteristics and functional ability at admission, expected to contribute to classification at discharge from previous studies and clinical perspectives. They include age, functional abilities, comprehension, upper extremity function, type of stroke, and the daily amount of rehabilitation (physical, occupational, and speech therapies) during hospitalization.

We have included the following functional outcomes in FIM items: eating,<sup>28, 31)</sup> locomotion (walk/wheelchair),<sup>32)</sup> and comprehension.<sup>29, 33)</sup> Stroke patients had a higher possibility of being discharged home if admitted with a higher motor FIM score and a lower chance of being discharged home if they were older or had a cognitive defect.<sup>34)</sup> FIM toileting was one of the initial items that predicted disposition in acute stroke patients.<sup>31)</sup> Based on the motor FIM score at admission, there was a correlation between locomotion gain and other self-care in stroke patients. A variation in locomotion gain influenced the improvement in self-care.<sup>32)</sup> In addition, aphasia was identified as a strong prognostic factor in post-stroke outcomes.<sup>33)</sup> Furthermore, deficits in auditory comprehension, reading comprehension, and oral spelling to dictation were associated with a higher possibility of discharge to a setting other than home.<sup>29)</sup>

The use of the NIHSS score as an early predictor of outcome following acute hospitalization for stroke has received support.<sup>35)</sup> The NIHSS score of the affected upper extremity assessed

at admission was associated with long-term functional outcomes evaluated using the FIM in patients with middle cerebral artery infarction.<sup>36)</sup>

The types of stroke confirmed in the dataset were grouped into the following eight categories: lacunar infarction, atherothrombotic cerebral infarction, cardiogenic embolism, cerebral infarction (others/unknown), hypertensive cerebral hemorrhage, cerebral hemorrhage (others/unknown), subarachnoid hemorrhage, and others/unknown.

Regarding the amount of daily rehabilitation, following Japanese health insurance guidelines, 20-minute rehabilitation (physical, occupational, and speech therapies) is defined as 1 unit. This study categorized the amount of daily rehabilitation provided for each patient available on the dataset into four groups: <2 units (<40 min),  $\geq 2$ –<4 units (40–80 min),  $\geq 4$ –<6 units (80–120 min), and  $\geq 6$  units (>120 min).

## *Statistical Analyses*

We used the two-step method proposed by Bakk and Kuha<sup>37)</sup> in developing a prediction model of LCA for the patient characteristics at discharge. When developing a prediction model, this method has less bias than other methods and is recommended even when missing values exist.<sup>38-40)</sup> The two-step method comprises the following steps: 1) to fit the latent class measurement model on its own and 2) to maximize the joint likelihood with the measurement model's parameters and exogenous latent variables' parameters fixed at the first step's estimated values, allowing only the structural model's remaining parameters to be estimated in the second step.<sup>37)</sup>

In the first step, we conducted an LCA with our selected outcome variables to identify the patient's condition at discharge. The optimal latent model for the number of latent classes was determined using a combination of Bayesian information criterion (BIC), entropy, Vuong-Lo-

Mendell-Rubin, and class size.<sup>41, 42)</sup> For the second step, we estimated a prediction model for the calculated classes in the first step with our selected predictor variables of the patient condition at admission. In addition, we processed missing data by employing full information maximum likelihood default in Latent GOLD®6.0.<sup>43, 44)</sup> We used the Latent GOLD®6.0 (Statistical Innovations, Arlington, MA, USA) for LCA and the calculation of prediction models. The significance level was set at  $P<.05$ .

## Results

### *Patient Characteristics*

After applying the inclusion and exclusion criteria in this study, 6,881 patients were included (Figure 1), and baseline characteristics at admission and discharge are summarized in Table 1. The mean age at admission was 73.7 years, and the average length of stay was 29.5 days. The total FIM scores, scores of all FIM subitems, and scores of the NIHSS improved at discharge from admission.

### *Latent Classes of Patient Characteristics at Discharge*

Overall, 6,881 patients were classified into latent classes using LCA based on their outcomes. Latent class models with 1–12 classes were examined to select the best latent class. Model-fit statistics for LCA models with 1–12 classes are shown in Table 2. The difference in BIC/AIC fit between the models showed that it began to decline in the nine-class model. The smallest class size was <5% after the nine-class model.

In determining the number of classes, one occupational therapist and two occupational therapy students selected the nine-class model for this study, based on the interpretability of the class characteristics, given that a minimum class size of at least 5% is recommended.<sup>42)</sup>

Table 3 shows the class sizes and item response probabilities for the outcomes at discharge within each class. For example, a class size of 29% for Class 1 indicates that 29% of all patients belong to this class and that 97% of the patients within Class 1 would return home as “Discharge destination.” The overall characteristics of each class indicated that Class 1 was the mildest (shorter length of stay and the highest possibility of home discharge), and Class 2 was the most severe (longer length of stay and the highest possibility of transfers, including deaths). Different gradations characterized classes 3–9; these patient characteristics were clinically acceptable.

### ***Predictors of Class Membership***

All predictors of patient characteristics at admission were significant enough to predict outcomes at discharge ( $P < .01$ ), and the standard R-squared, which indicates the goodness-of-fit of the prediction model, was 0.3383 (Table S1, S2). Relatively stronger predictors relative to Class 1 (maximum odds ratio was  $>10.0$  in a single predictor) were the right/left motor arm of the NIHSS score. In particular, Class 8 showed extremely high odds of belonging if the left motor arm of the NIHSS score was 4. Additionally, Class 9 also showed particularly high odds if the right motor arm of the NIHSS score was 4. Furthermore, regarding the amount of daily rehabilitation, the odds ratio tended to decrease in the severe class and increase in the mild class as the amount of rehabilitation increased. However, this was not always the case.

### ***Model Application***

Our prediction model can predict the overall patient characteristics of acute stroke patients at discharge (Video S1). The predicted results can allow practitioners to provide appropriate

interventions that maximize effectiveness. Our patient, for example, is aged 85 years with a cardiogenic embolism and severe disability on the right side of the body. The patient is provided 4–6 units (80–120 min) of rehabilitation daily and requires modified to complete assistance with ADLs. According to the predicted probability, the patient has the highest possibility of transfer and right moderate upper extremity disability at discharge. The patient is predicted to require modified to complete assistance with ADLs and complete assistance with communication and social interaction.

## Discussion

This study used LCA to classify acute stroke patients based on the overall patient condition at discharge. We also developed a model to predict their class based on patient characteristics at admission. The results showed that overall patient conditions at discharge were classified into nine classes, and all the selected predictors at admission were significantly associated with class memberships. This model was innovative in predicting the overall patient outcomes, which previous models have been unable to resolve, including the appropriate rehabilitation intensity and length of stay.

As for the predictors of this study, age, functional abilities, comprehension, upper extremity function, stroke type, and amount of rehabilitation (physical, occupational, and speech therapies) per day during hospitalization were significantly associated with class membership at discharge. These results were similar to those of previous studies.<sup>33, 34, 36, 45)</sup>

There are two points of particular note in this study's findings. The first point was that the severity of the left and right upper extremities paralysis at admission had different patient characteristics at discharge. This study showed that Classes 6 and 8 were characterized as severe to moderate paralysis of the left upper extremity at discharge. Communication in these

classes ranged from independence to modified dependence, although ADLs such as self-care were modified to complete dependence. These may be due to the influence of unilateral spatial neglect, which may be a factor causing the need for assistance with ADLs.<sup>46, 47)</sup> In addition, Class 9 was characterized as severe to moderate paralysis of the right upper extremity at the discharge. In this class, communication was complete dependence, and ADLs such as self-care ranged from modified to complete dependence. These may be due to the influence of aphasia, which may cause difficulties with communication.<sup>48)</sup> These results were clinically convincing, and appropriate rehabilitation could be provided by addressing these factors from the early stages of admission.

The second point was the intensity of rehabilitation. In some classes, a higher intensity of rehabilitation did not necessarily lead to better outcomes. It is necessary to reconsider the currently accepted philosophy "more practice is always better," particularly in the first days after a stroke.<sup>49)</sup> The model developed in this study also improves the calculation of how the overall outcome at discharge is affected by the intensity of provided rehabilitation. Therefore, by using the model of this study, providing individualized rehabilitation with its intensity optimized for the patient's characteristics is possible.

### ***Limitations***

There were some limitations in this study. First, we did not conduct internal and external validation. A prediction model should be validated using original data to examine internal validity through methods such as resampling (e.g., cross-validation and bootstrapping) and using other participants' data from the same or different institutions or periods to improve the model's validity (external validation).<sup>50)</sup> Therefore, before applying this prediction model to actual clinical practice, validation of this prediction model needs to be performed. Second,

the dataset we referred to did not contain enough details about interventions provided for participants. Hence, the difference in interventions among participants might have influenced the LCA and prediction model results.

Third, other potential predictors that significantly influence the outcomes at discharge can be available at admission. However, in this study, we selected predictor variables according to the findings of as many previous studies as possible and our clinical viewpoint. Therefore, we consider the model the most applicable presently. The model will be more accurate if these issues are addressed in future validation studies.

## Conclusion

In conclusion, we developed a prediction model of overall patient conditions, including the appropriate rehabilitation intensity in acute stroke patients using LCA. Before applying this model to actual clinical practice, internal and external validation would be required to improve its validity. Further studies could shed light on the potential influence of the predictors and the appropriate amount of rehabilitation for stroke patients, depending on their medical characteristics and severity.

## Acknowledgments

We thank the rehabilitation patient database developed by the Japan Association of Rehabilitation Database for providing the data for this study. This study's results and conclusions are the authors' views, not the official views of the Japanese Association of Rehabilitation Medicine. We also appreciate the participants, their families, and the associations involved in this study.

### 333 **Funding/Support**

334 This work was supported by JSPS KAKENHI (Grant number: JP20H03914).

335

### 336 **Conflict of Interest Disclosures**

337 The authors declare that the research was conducted without any commercial or financial  
338 relationships that could be construed as a potential conflict of interest.

339

### 340 **Supplemental Material**

341 Tables S1. Model fit of the prediction model

342 Table S2. Odds ratios (ORs) and p-values from the multivariate prediction of class  
343 membership (n=6,881)

344 Movie S1. Model application

345

346

347

348

349

350

351

### 352 **References**



- 353 1. World Health Organization. Stroke, Cerebrovascular accident. @whoemro.  
354 <http://www.emro.who.int/health-topics/stroke-cerebrovascular-accident/index.html>.  
355 Published 2023. Accessed 2/9, 2023.
- 356 2. Winstein CJ, Stein J, Arena R, Bates B, Cherney LR, Cramer SC, Deruyter F, Eng JJ,  
357 Fisher B, Harvey RL, et al. Guidelines for Adult Stroke Rehabilitation and Recovery:  
358 A Guideline for Healthcare Professionals From the American Heart  
359 Association/American Stroke Association. *Stroke*. 2016;47:e98–e169.
- 360 3. Powers WJ, Rabinstein AA, Ackerson T, Adeoye OM, Bambakidis NC, Becker K,  
361 Biller J, Brown M, Demaerschalk BM, Hoh B, et al. Guidelines for the Early  
362 Management of Patients With Acute Ischemic Stroke: 2019 Update to the 2018  
363 Guidelines for the Early Management of Acute Ischemic Stroke: A Guideline for  
364 Healthcare Professionals From the American Heart Association/American Stroke  
365 Association. *Stroke*. 2019;50:e344–e418.
- 366 4. Cormier DJ, Frantz MA, Rand E, Stein J. Physiatrist referral preferences for  
367 postacute stroke rehabilitation. *Medicine (Baltimore)*. 2016;95:e4356.
- 368 5. Kennedy GM, Brock KA, Lunt AW, Black SJ. Factors influencing selection for  
369 rehabilitation after stroke: A questionnaire using case scenarios to investigate  
370 physician perspectives and level of agreement. *Arch Phys Med Rehabil*.  
371 2012;93:1457–1459.
- 372 6. Stinear CM, Smith M-C, Byblow WD. Prediction tools for stroke rehabilitation.  
373 *Stroke*. 2019;50:3314–3322.
- 374 7. de Ridder IR, Dijkland SA, Scheele M, den Hertog HM, Dirks M, Westendorp WF,  
375 Nederkoorn PJ, van de Beek D, Ribbers GM, Steyerberg EW, et al. Development and  
376 validation of the Dutch Stroke Score for predicting disability and functional outcome

- 377 after ischemic stroke: A tool to support efficient discharge planning. *Eur Stroke J.*  
378 2018;3:165–173.
- 379 8. Douiri A, Grace J, Sarker SJ, Tilling K, McKevitt C, Wolfe CD, Rudd AG. Patient-  
380 specific prediction of functional recovery after stroke. *Int J Stroke.* 2017;12:539–  
381 548.
- 382 9. Scrutinio D, Lanzillo B, Guida P, Mastropasqua F, Monitillo V, Pusineri M, Formica  
383 R, Russo G, Guarnaschelli C, Ferretti C, et al. Development and validation of a  
384 predictive model for functional outcome after stroke rehabilitation: The Maugeri  
385 model. *Stroke.* 2017;48:3308–3315.
- 386 10. Nijland RH, van Wegen EE, Harmeling-van der Wel BC, Kwakkel G, Investigators  
387 E. Presence of finger extension and shoulder abduction within 72 hours after stroke  
388 predicts functional recovery: early prediction of functional outcome after stroke: The  
389 EPOS cohort study. *Stroke.* 2010;41:745–750.
- 390 11. Stinear CM, Byblow WD, Ackerley SJ, Smith MC, Borges VM, Barber PA. PREP2:  
391 A biomarker-based algorithm for predicting upper limb function after stroke. *Ann*  
392 *Clin Transl Neurol.* 2017;4:811–820.
- 393 12. Bland MD, Sturmoski A, Whitson M, Connor LT, Fucetola R, Huskey T, Corbetta M,  
394 Lang CE. Prediction of discharge walking ability from initial assessment in a stroke  
395 inpatient rehabilitation facility population. *Arch Phys Med Rehabil.* 2012;93:1441–  
396 1447.
- 397 13. Kinoshita S, Abo M, Okamoto T, Tanaka N. Utility of the revised version of the  
398 ability for basic movement scale in predicting ambulation during rehabilitation in  
399 poststroke patients. *J Stroke Cerebrovasc Dis.* 2017;26:1663–1669.

- 400 14. Kwah LK, Harvey LA, Diong J, Herbert RD. Models containing age and NIHSS  
401 predict recovery of ambulation and upper limb function six months after stroke: An  
402 observational study. *J Physiother.* 2013;59:189–197.
- 403 15. Sánchez-Blanco I, Ochoa-Sangrador C, López-Munaín L, Izquierdo-Sánchez M,  
404 Fermoso-Garcia J. Predictive model of functional independence in stroke patients  
405 admitted to a rehabilitation programme. *Clin Rehabil.* 1999;13:464–475.
- 406 16. Smith M-C, Barber PA, Stinear CM. The TWIST algorithm predicts time to walking  
407 independently after stroke. *Neurorehabil Neural Repair.* 2017;31:955–964.
- 408 17. Veerbeek JM, Van Wegen EE, Harmeling-Van der Wel BC, Kwakkel G, Investigators  
409 E. Is accurate prediction of gait in nonambulatory stroke patients possible within 72  
410 hours poststroke? The EPOS study. *Neurorehabil Neural Repair.* 2011;25:268–274.
- 411 18. Faigle R, Marsh EB, Llinas RH, Urrutia VC, Gottesman RF. Novel score predicting  
412 gastrostomy tube placement in intracerebral hemorrhage. *Stroke.* 2015;46:31–36.
- 413 19. Galovic M, Stauber AJ, Leisi N, Krammer W, Brugger F, Vehoff J, Balcerak P,  
414 Muller A, Muller M, Rosenfeld J, et al. Development and validation of a prognostic  
415 model of swallowing recovery and enteral tube feeding after ischemic stroke. *JAMA*  
416 *Neurology.* 2019;76:561–570.
- 417 20. Formann AK, Kohlmann T. Latent class analysis in medical research. *Stat Methods*  
418 *Med Res.* 1996;5:179–211.
- 419 21. Kongsted A, Nielsen AM. Latent class analysis in health research. *J Physiother.*  
420 2017;63:55–58.
- 421 22. Kinoshita S, Kakuda W, Momosaki R, Yamada N, Sugawara H, Watanabe S, Abo M.  
422 Clinical management provided by board-certificated physiatrists in early  
423 rehabilitation is a significant determinant of functional improvement in acute stroke

- 424 patients: A retrospective analysis of Japan rehabilitation database. *J Stroke*  
425 *Cerebrovasc Dis.* 2015;24:1019–1024.
- 426 23. Jeong S, Kondo K, Shiraishi N, Inoue Y. An evaluation of the quality of post-stroke  
427 rehabilitation in Japan. *Clinical Audit.* 2010;2:59–66.
- 428 24. Kamo T, Momosaki R, Suzuki K, Asahi R, Azami M, Ogihara H, Nishida Y.  
429 Effectiveness of intensive rehabilitation therapy on functional outcomes after stroke:  
430 A propensity score analysis based on Japan Rehabilitation Database. *J Stroke*  
431 *Cerebrovasc Dis.* 2019;28:2537–2542.
- 432 25. Ottenbacher KJ, Hsu Y, Granger CV, Fiedler RC. The reliability of the functional  
433 independence measure: A quantitative review. *Arch Phys Med Rehabil.*  
434 1996;77:1226–1232.
- 435 26. Furuta H, Mizuno K, Unai K, Ebata H, Yamauchi K, Watanabe M. Functional  
436 Independence Measure subtypes among inpatients with subacute stroke:  
437 Classification via latent class analysis. *Prog Rehabil Med.* 2022;7:20220021.
- 438 27. Pedersen AR, Severinsen K, Nielsen JF. The effect of age on rehabilitation outcome  
439 after traumatic brain injury assessed by the Functional Independence Measure (FIM).  
440 *Neurorehabil Neural Repair.* 2014;29:299–307.
- 441 28. Aoki K, Iguchi A, Watabe T. Evaluation of Functional Independence Measure item  
442 scores for predicting home discharge after acute stroke rehabilitation. *Japanese*  
443 *Journal of Comprehensive Rehabilitation Science.* 2020;11:17–20.
- 444 29. González-Fernández M, Christian AB, Davis C, Hillis AE. Role of aphasia in  
445 discharge location after stroke. *Arch Phys Med Rehabil.* 2013;94:851–855.
- 446 30. Lyden P. Using the National Institutes of Health Stroke Scale. *Stroke.* 2017;48:513–  
447 519.

- 448 31. Mauthe RW, Haaf DC, Haya P, Krall JM. Predicting discharge destination of stroke  
449 patients using a mathematical model based on six items from the functional  
450 independence measure. *Arch Phys Med Rehabil.* 1996;77:10–13.
- 451 32. Kimura T. Interaction between locomotion and self-care for patients with stroke in  
452 severity classification based on the motor Functional Independence Measure upon  
453 admission to the recovery ward. *Open J Ther Rehabil.* 2020;08:164–182.
- 454 33. Gialanella B, Bertolinelli M, Lissi M, Prometti P. Predicting outcome after stroke:  
455 The role of aphasia. *Disabil Rehabil.* 2011;33:122–129.
- 456 34. Nguyen VQ, PrvuBettger J, Guerrier T, Hirsch MA, Thomas JG, Pugh TM, Rhoads  
457 CF 3rd. Factors associated with discharge to home versus discharge to institutional  
458 care after inpatient stroke rehabilitation. *Arch Phys Med Rehabil.* 2015;96:1297–  
459 1303.
- 460 35. Schlegel D, Kolb SJ, Luciano JM, Tovar JM, Cucchiara BL, Liebeskind DS, Kasner  
461 SE. Utility of the NIH Stroke Scale as a predictor of hospital disposition. *Stroke.*  
462 2003;34:134–137.
- 463 36. Saito J, Koyama T, Domen K. Long-term outcomes of FIM motor items predicted  
464 from acute stage NIHSS of patients with middle cerebral artery infarct. *Ann Rehabil*  
465 *Med.* 2018;42:670–681.
- 466 37. Bakk Z, Kuha J. Two-step estimation of models between latent classes and external  
467 variables. *Psychometrika.* 2018;83:871–892.
- 468 38. Vermunt JK, Magidson J. How to perform three-step latent class analysis in the  
469 presence of measurement non-invariance or differential item functioning. *Struct Equ*  
470 *Modeling.* 2020;28:356–364.

- 471 39. Alagöz ÖEC, Vermunt JK. Stepwise latent class analysis in the presence of missing  
472 values on the class indicators. *Struct Equ Modeling*. 2022;29:784–790.
- 473 40. Janssen JHM, van Laar S, de Rooij MJ, Kuha J, Bakk Z. The detection and modeling  
474 of direct effects in latent class analysis. *Struct Equ Modeling*. 2018;26:280–290.
- 475 41. Nylund KL, Asparouhov T, Muthén BO. Deciding on the number of classes in latent  
476 class analysis and growth mixture modeling: A Monte Carlo simulation study. *Struct*  
477 *Equ Modeling*. 2007;14:535–569.
- 478 42. Weller BE, Bowen NK, Faubert SJ. Latent class analysis: A guide to best practice. *J*  
479 *Black Psychol*. 2020;46:287–311.
- 480 43. Edwards SL, Berzofsky ME, Biemer PP. RTI Press Methods Report Series. In:  
481 *Addressing Nonresponse for Categorical Data Items Using Full Information*  
482 *Maximum Likelihood with Latent GOLD 5.0*. Research Triangle Park (NC): RTI  
483 Press © 2018 Research Triangle Institute. All rights reserved.; 2018.
- 484 44. Vermunt JK, Magidson J. *Upgrade Manual for Latent GOLD Basic, Advanced,*  
485 *Syntax, and Choice Version 6.0*. Arlington. MA: Statistical Innovations Inc.; 2021.
- 486 45. Wee JY, Hopman WM. Stroke impairment predictors of discharge function, length of  
487 stay, and discharge destination in stroke rehabilitation. *Am J Phys Med Rehabil*.  
488 2005;84:604–612.
- 489 46. Doron N, Rand D. Is unilateral spatial neglect associated with motor recovery of the  
490 affected upper extremity poststroke? A systematic review. *Neurorehabil Neural*  
491 *Repair*. 2019;33:179–187.
- 492 47. Ten Brink AF, Verwer JH, Biesbroek JM, Visser-Meily JMA, Nijboer TCW.  
493 Differences between left- and right-sided neglect revisited: A large cohort study  
494 across multiple domains. *J Clin Exp Neuropsychol*. 2017;39:707–723.

48. Gialanella B, Ferlucci C. Functional outcome after stroke in patients with aphasia and neglect: Assessment by the motor and cognitive functional independence measure instrument. *Cerebrovas Dis.* 2010;30:440–447.
49. Bernhardt J, Churilov L, Ellery F, Collier J, Chamberlin J, Langhorne P, Lindley RI, Moodie M, Dewey H, Thrift AG, et al. Prespecified dose-response analysis for A Very Early Rehabilitation Trial (AVERT). *Neurology.* 2016;86:2138–2145.
50. Iwagami M, Matsui H. Introduction to clinical prediction models. *Ann Clin Epidemiol.* 2022;4:72–80

## Figure Legend

**Figure 1** Flow diagram of the patient section process

The data source was the Japan Association of Rehabilitation Database

508

509 Table 1. Patient Characteristics of the Study

| Continuous variable                                    | Mean (SD)     |             |
|--------------------------------------------------------|---------------|-------------|
| Age, in years                                          | 73.7 (12.7)   |             |
| Length of stay, days                                   | 29.5 (21.4)   |             |
|                                                        | Admission     | Discharge   |
| Motor-FIM (admission: N=6,751, discharge: N=6,652)     | 33.4 (23.5)   | 57.0 (29.7) |
| Cognitive-FIM (admission: N=6,774, discharge: N=6,676) | 20.8 (11.4)   | 24.1 (10.7) |
| FIM (total) (admission: N=6,821, discharge: N=6,726)   | 54.2 (32.6)   | 80.9 (39.1) |
| NIHSS (total) (admission: N=6,575, discharge: N=6,544) | 8.3 (8.9)     | 6.2 (8.2)   |
| Category variable                                      | N (%)         |             |
| Sex Female                                             | 3,046 (44.3%) |             |
| Type of stroke                                         |               |             |
| Lacunar infarction                                     | 1,091 (15.9%) |             |
| Atherothrombotic cerebral infarction                   | 1,697 (24.7%) |             |
| Cardiogenic embolism                                   | 1,138 (16.5%) |             |
| Cerebral infarction (Others/unknown)                   | 614 ( 8.9%)   |             |
| Hypertensive cerebral hemorrhage                       | 1,169 (17.0%) |             |
| Cerebral hemorrhage (Others/unknown)                   | 400 (5.8%)    |             |



|                                             |                  |                  |
|---------------------------------------------|------------------|------------------|
| Subarachnoid hemorrhage                     | 339 (4.9%)       |                  |
| Others/Unknown                              | 60 (0.9%)        |                  |
| Missing                                     | 373 (5.4%)       |                  |
| <b>Amount of rehabilitation per day</b>     |                  |                  |
| Less than 2 units (less than 40 min)        | 2,277 (33.1%)    |                  |
| 2 or more to less than 4 units (40-80 min)  | 2,329 (33.8%)    |                  |
| 4 or more to less than 6 units (80-120 min) | 990 (14.4%)      |                  |
| 6 or more units (more than 120 min)         | 1,285 (18.7%)    |                  |
|                                             | <b>Admission</b> | <b>Discharge</b> |
| <b>Motor arm of the NIHSS (right)</b>       |                  |                  |
| 0                                           | 4,011<br>(58.3%) | 4,657<br>(67.7%) |
| 1                                           | 889<br>(12.9%)   | 584<br>(8.5%)    |
| 2                                           | 433 (6.3%)       | 348<br>(5.1%)    |
| 3                                           | 390 (5.7%)       | 345<br>(5.0%)    |
| 4                                           | 687<br>(10.0%)   | 466<br>(6.8%)    |
| Missing                                     | 471 (6.8%)       | 481<br>(7.0%)    |
| <b>Motor arm of the NIHSS (left)</b>        |                  |                  |

|         |            |           |
|---------|------------|-----------|
| 0       | 3,921      | 4,527     |
|         | (57.0%)    | (65.8%)   |
| 1       | 864        | 599       |
|         | (12.6%)    | (8.7%)    |
| 2       | 477 (6.9%) | 384       |
|         |            | (5.6%)    |
| 3       | 424 (6.2%) | 371       |
|         |            | (5.4%)    |
| 4       | 723        | 519 7.5%) |
|         | (10.5%)    |           |
| Missing | 472 (6.9%) | 481       |
|         |            | (7.0%)    |

#### **FIM locomotion (walk/wheelchair)**

|                            |            |         |
|----------------------------|------------|---------|
| Complete dependence (1, 2) | 4,995      | 2,372   |
|                            | (72.6%)    | (34.5%) |
| Modified dependence (3-5)  | 1,199      | 1,557   |
|                            | (17.4%)    | (22.6%) |
| Independence (6, 7)        | 610 (8.9%) | 2,782   |
|                            |            | (40.4%) |
| Missing                    | 77 (1.1%)  | 170     |
|                            |            | (2.5%)  |

#### **FIM toileting**

|                            |         |         |
|----------------------------|---------|---------|
| Complete dependence (1, 2) | 4,157   | 2,103   |
|                            | (60.4%) | (30.6%) |
| Modified dependence (3-5)  | 1,546   | 1,414   |

|                                      |            |         |
|--------------------------------------|------------|---------|
|                                      | (22.5%)    | (20.5%) |
| Independence (6, 7)                  | 1,099      | 3,198   |
|                                      | (16.0%)    | (46.5%) |
| Missing                              | 79 (1.1%)  | 166     |
|                                      |            | (2.4%)  |
| <b>FIM transfer (shower/bathtub)</b> |            |         |
| Complete dependence (1, 2)           | 6,128      | 2,982   |
|                                      | (89.1%)    | (43.3%) |
| Modified dependence (3-5)            | 390 (5.7%) | 1,841   |
|                                      |            | (26.8%) |
| Independence (6, 7)                  | 286 (4.2%) | 1,885   |
|                                      |            | (27.4%) |
| Missing                              | 77 (1.1%)  | 173     |
|                                      |            | (2.5%)  |
| <b>FIM transfers</b>                 |            |         |
| <b>(bed/chair/wheelchair)</b>        |            |         |
| Complete dependence (1, 2)           | 3,888      | 1,486   |
|                                      | (56.5%)    | (21.6%) |
| Modified dependence (3-5)            | 2,002      | 2,083   |
|                                      | (29.1%)    | (30.3%) |
| Independence (6, 7)                  | 921        | 3,146   |
|                                      | (13.4%)    | (45.7%) |
| Missing                              | 70 (1.0%)  | 166     |
|                                      |            | (2.4%)  |
| <b>FIM eating</b>                    |            |         |

|                            |           |         |
|----------------------------|-----------|---------|
| Complete dependence (1, 2) | 3,098     | 1,454   |
|                            | (45.0%)   | (21.1%) |
| Modified dependence (3-5)  | 1,163     | 1,044   |
|                            | (16.9%)   | (15.2%) |
| Independence (6, 7)        | 2,554     | 4,219   |
|                            | (37.1%)   | (61.3%) |
| Missing                    | 66 (1.0%) | 164     |
|                            |           | (2.4%)  |

#### **FIM comprehension**

|                            |           |         |
|----------------------------|-----------|---------|
| Complete dependence (1, 2) | 1,805     | 1,130   |
|                            | (26.2%)   | (16.4%) |
| Modified dependence (3-5)  | 1,828     | 1,818   |
|                            | (26.6%)   | (26.4%) |
| Independence (6, 7)        | 3,153     | 3,740   |
|                            | (45.8%)   | (54.4%) |
| Missing                    | 95 (1.4%) | 193     |
|                            |           | (2.8%)  |

#### **FIM expression**

|                            |           |         |
|----------------------------|-----------|---------|
| Complete dependence (1, 2) | 2,019     | 1,354   |
|                            | (29.3%)   | (19.7%) |
| Modified dependence (3-5)  | 1,730     | 1,645   |
|                            | (25.1%)   | (23.9%) |
| Independence (6, 7)        | 3,036     | 3,689   |
|                            | (44.1%)   | (53.6%) |
| Missing                    | 96 (1.4%) | 193     |

(2.8%)

# **FIM social interaction**

|                            |           |         |
|----------------------------|-----------|---------|
| Complete dependence (1, 2) | 2,413     | 1,459   |
|                            | (35.1%)   | (21.2%) |
| Modified dependence (3-5)  | 1,474     | 1,462   |
|                            | (21.4%)   | (21.2%) |
| Independence (6, 7)        | 2,916     | 3,788   |
|                            | (42.4%)   | (55.1%) |
| Missing                    | 78 (1.1%) | 172     |
|                            |           | (2.5%)  |

---

Abbreviations: FIM, Functional Independence Measure (range, 18–126, higher = better); NIHSS, National Institutes of Health Stroke Scale (range, 0–42, higher = worse); N, number of participants; SD, standard deviation

510

511

512 Table 2. Model-fit Statistics for LCA Models with 1–12 Classes

|          |          |        |       |        |       |      |       |                        | Smallest   |
|----------|----------|--------|-------|--------|-------|------|-------|------------------------|------------|
|          | LL       | BIC    | ΔBIC  | AIC    | ΔAIC  | df   | VLMR  | Entropy R <sup>2</sup> | class size |
| 1-Class  | -82978   | 166230 | -     | 166018 | -     | 6858 |       | 1.00                   | —          |
| 2-Class  | -62502   | 125561 | 40669 | 125130 | 40888 | 6826 | 40952 | 0.94                   | 46%        |
| 3-Class  | -56534   | 113907 | 11654 | 113257 | 11873 | 6794 | 11937 | 0.94                   | 25%        |
| 4-Class  | -54963   | 111048 | 2859  | 110180 | 3078  | 6762 | 3142  | 0.92                   | 16%        |
| 5-Class  | -53875   | 109155 | 1893  | 108068 | 2111  | 6730 | 2175  | 0.92                   | 13%        |
| 6-Class  | -53000   | 107688 | 1467  | 106383 | 1685  | 6698 | 1749  | 0.92                   | 6.8%       |
| 7-Class  | -52566   | 107102 | 586   | 105578 | 805   | 6666 | 869   | 0.91                   | 6.0%       |
| 8-Class  | -52218   | 106688 | 414   | 104945 | 633   | 6634 | 697   | 0.88                   | 5.6%       |
| 9-Class  | -51933   | 106403 | 286   | 104440 | 505   | 6602 | 569   | 0.88                   | 4.5%       |
| 10-Class | -51763   | 106345 | 58    | 104164 | 277   | 6570 | 341   | 0.87                   | 1.5%       |
| 11-Class | -51620   | 106341 | 3     | 103941 | 222   | 6538 | 286   | 0.87                   | 1.5%       |
| 12-Class | -51498.6 | 106380 | -39   | 103763 | 178   | 6498 | 242   | 0.86                   | 1.4%       |

<sup>a</sup>Based on model selection statistics, comparison of LCA models with different latent classes.

LCA, Latent class analysis; LL, Log-likelihood; BIC, Bayesian information criterion (lower values imply better model fit); AIC, Akaike information criterion (lower values imply better model fit); df, degree of freedom; VLMR, Vuong-Lo-Mendell-Rubin likelihood ratio test; Entropy, higher values imply better classification quality

513 Table 3. Class Sizes Belonging to Each Class and the Item Response Probabilities

|            | Class 1     | Class 2        | Class 3     | Class 4     | Class 5     | Class 6        | Class 7     | Class 8      | Class 9      | Over<br>all |
|------------|-------------|----------------|-------------|-------------|-------------|----------------|-------------|--------------|--------------|-------------|
| Class size | 29%         | 15%            | 11%         | 10%         | 10%         | 9%             | 6%          | 6%           | 4%           |             |
| Summary    | Discharge   | Discharge      | Discharge   | Discharge   | Discharge   | Discharge      | Discharge   | Discharge    | Discharge    |             |
|            | destination | destination    | destination | destination | destination | destination    | destination | destination: | destination: |             |
|            | n: Home     | : different    | :           | : Different | : Different | : Different    | : home      | Different    | Different    |             |
|            | Length of   | hospitals      | Home/diff   | hospitals   | hospitals   | hospitals      | Length of   | hospitals    | hospitals    |             |
|            | stay: 1–14  | Length of      | erent       | Length of   | Length of   | Length of      | stay: 1     | Length of    | Length of    |             |
|            | days        | stay: $\geq 4$ | hospitals   | stay: 2–6   | stay: 2–6   | stay: $\geq 4$ | day–6       | stay: 2–6    | stay: 2–6    |             |
|            | Upper       | weeks          | Length of   | weeks       | weeks       | weeks          | weeks       | weeks        | weeks        |             |
|            | extremity   | Upper          | stay: 2–4   | Upper       | Upper       | Upper          | Upper       | Upper        | Upper        |             |
|            | function:   | extremity      | weeks       | extremity   | extremity   | extremity      | extremity   | extremity    | extremity    |             |
|            | Mild        | function:      | Upper       | function:   | function:   | function:      | function:   | function:    | function:    |             |
|            | disability  | Severe         | extremity   | Mild        | Mild        | Moderate       | Mild        | Moderate     | Moderate     |             |
|            | Functional  | disability     | function:   | disability  | disability  | disability     | disability  | disability   | disability   |             |

[illegible]



|                                  |     |     |     | interaction<br>: Independence | interaction<br>: Modified dependence |     |     | dependenc<br>e |     |     |
|----------------------------------|-----|-----|-----|-------------------------------|--------------------------------------|-----|-----|----------------|-----|-----|
| Discharge destination            |     |     |     |                               |                                      |     |     |                |     |     |
| Home                             | 97% | 4%  | 46% | 30%                           | 35%                                  | 7%  | 64% | 5%             | 9%  | 46% |
| Transfer to a different hospital | 1%  | 77% | 52% | 61%                           | 60%                                  | 82% | 33% | 91%            | 81% | 48% |
| Transfer to a facility           | 1%  | 7%  | 1%  | 6%                            | 4%                                   | 7%  | 1%  | 3%             | 7%  | 4%  |
| Death                            | 0%  | 7%  | 0%  | 0%                            | 0%                                   | 1%  | 0%  | 0%             | 0%  | 1%  |
| Others                           | 1%  | 5%  | 1%  | 3%                            | 1%                                   | 3%  | 2%  | 1%             | 3%  | 2%  |
| Length of stay                   |     |     |     |                               |                                      |     |     |                |     |     |

|                        |     |     |     |     |     |     |     |     |     |     |
|------------------------|-----|-----|-----|-----|-----|-----|-----|-----|-----|-----|
| <2 weeks (1–14 days)   | 55% | 8%  | 6%  | 16% | 19% | 9%  | 21% | 5%  | 6%  | 24% |
| 2–4 weeks (15–28 days) | 35% | 19% | 50% | 40% | 40% | 28% | 42% | 33% | 34% | 35% |
| 4–6 weeks (29–42 days) | 7%  | 28% | 25% | 24% | 27% | 29% | 21% | 36% | 32% | 21% |
| >6 weeks (>42 days)    | 3%  | 44% | 19% | 21% | 14% | 35% | 16% | 27% | 28% | 20% |
| NIHSS score            |     |     |     |     |     |     |     |     |     |     |
| Right motor arm        |     |     |     |     |     |     |     |     |     |     |
| 0                      | 97% | 20% | 85% | 74% | 79% | 54% | 91% | 77% | 40% | 72% |
| 1                      | 3%  | 9%  | 11% | 17% | 13% | 17% | 5%  | 5%  | 15% | 9%  |
| 2                      | 0%  | 16% | 2%  | 4%  | 4%  | 13% | 1%  | 5%  | 14% | 6%  |
| 3                      | 0%  | 17% | 2%  | 4%  | 3%  | 9%  | 1%  | 9%  | 16% | 6%  |

|                        |     |     |     |     |     |     |     |     |     |     |
|------------------------|-----|-----|-----|-----|-----|-----|-----|-----|-----|-----|
| 4                      | 0%  | 37% | 1%  | 1%  | 1%  | 7%  | 1%  | 4%  | 15% | 8%  |
| Left motor<br>arm      |     |     |     |     |     |     |     |     |     |     |
| 0                      | 96% | 24% | 81% | 77% | 72% | 37% | 96% | 35% | 84% | 70% |
| 1                      | 3%  | 11% | 12% | 15% | 14% | 12% | 2%  | 17% | 11% | 9%  |
| 2                      | 0%  | 15% | 3%  | 4%  | 6%  | 14% | 1%  | 16% | 4%  | 6%  |
| 3                      | 0%  | 16% | 2%  | 3%  | 6%  | 16% | 0%  | 19% | 0%  | 6%  |
| 4                      | 0%  | 35% | 1%  | 1%  | 2%  | 20% | 0%  | 14% | 0%  | 8%  |
| FiM item               |     |     |     |     |     |     |     |     |     |     |
| Eating                 |     |     |     |     |     |     |     |     |     |     |
| Complete<br>dependence | 0%  | 95% | 1%  | 7%  | 1%  | 47% | 0%  | 17% | 34% | 22% |
| Modified<br>dependence | 0%  | 5%  | 3%  | 42% | 16% | 45% | 7%  | 39% | 45% | 16% |

|                        |      |      |     |     |     |     |     |     |     |     |
|------------------------|------|------|-----|-----|-----|-----|-----|-----|-----|-----|
| Independence           | 100% | 1%   | 96% | 51% | 83% | 9%  | 93% | 44% | 22% | 62% |
| Transfer               |      |      |     |     |     |     |     |     |     |     |
| (bed/chair/wheelchair) |      |      |     |     |     |     |     |     |     |     |
| Complete dependence    | 0%   | 97%  | 0%  | 0%  | 0%  | 66% | 0%  | 27% | 3%  | 22% |
| Modified dependence    | 1%   | 3%   | 2%  | 97% | 88% | 34% | 7%  | 73% | 96% | 31% |
| Independence           | 99%  | 0%   | 98% | 3%  | 12% | 0%  | 93% | 0%  | 1%  | 47% |
| Toileting              |      |      |     |     |     |     |     |     |     |     |
| Complete dependence    | 0%   | 100% | 0%  | 11% | 3%  | 96% | 0%  | 69% | 54% | 32% |
| Modified dependence    | 0%   | 0%   | 5%  | 86% | 73% | 4%  | 13% | 31% | 46% | 21% |
| Independence           | 100% | 0%   | 95% | 3%  | 23% | 0%  | 87% | 0%  | 0%  | 47% |

|                                     |     |      |     |     |     |     |     |     |     |     |
|-------------------------------------|-----|------|-----|-----|-----|-----|-----|-----|-----|-----|
| Locomotion<br>(walk/wheelch<br>air) |     |      |     |     |     |     |     |     |     |     |
| Complete<br>dependence              | 0%  | 99%  | 1%  | 27% | 15% | 97% | 1%  | 86% | 56% | 36% |
| Modified<br>dependence              | 3%  | 1%   | 22% | 72% | 81% | 3%  | 32% | 13% | 44% | 23% |
| Independence                        | 97% | 0%   | 78% | 1%  | 4%  | 0%  | 67% | 1%  | 0%  | 41% |
| Transfer<br>(shower/bathtu<br>b)    |     |      |     |     |     |     |     |     |     |     |
| Complete<br>dependence              | 7%  | 100% | 5%  | 57% | 32% | 99% | 11% | 90% | 76% | 45% |
| Modified<br>dependence              | 18% | 0%   | 56% | 43% | 68% | 1%  | 57% | 10% | 24% | 27% |
| Independence                        | 75% | 0%   | 39% | 0%  | 0%  | 0%  | 32% | 0%  | 0%  | 28% |

Communication  
(comprehension)

|                     |     |     |      |     |     |     |     |     |     |     |
|---------------------|-----|-----|------|-----|-----|-----|-----|-----|-----|-----|
| Complete dependence | 0%  | 92% | 0%   | 2%  | 0%  | 4%  | 4%  | 0%  | 55% | 17% |
| Modified dependence | 1%  | 8%  | 0%   | 92% | 4%  | 91% | 87% | 9%  | 43% | 27% |
| Independence        | 99% | 0%  | 100% | 5%  | 96% | 5%  | 9%  | 91% | 2%  | 56% |

Communication  
(expression)

|                     |     |     |     |     |     |     |     |     |     |     |
|---------------------|-----|-----|-----|-----|-----|-----|-----|-----|-----|-----|
| Complete dependence | 0%  | 99% | 0%  | 2%  | 0%  | 13% | 10% | 0%  | 80% | 21% |
| Modified dependence | 1%  | 1%  | 6%  | 90% | 6%  | 84% | 77% | 11% | 20% | 25% |
| Independence        | 99% | 0%  | 93% | 8%  | 93% | 3%  | 13% | 89% | 0%  | 55% |

|                        |     |     |     |     |     |     |     |     |     |     |
|------------------------|-----|-----|-----|-----|-----|-----|-----|-----|-----|-----|
| Social<br>interaction  |     |     |     |     |     |     |     |     |     |     |
| Complete<br>dependence | 0%  | 95% | 0%  | 16% | 1%  | 33% | 8%  | 3%  | 54% | 22% |
| Modified<br>dependence | 3%  | 4%  | 7%  | 65% | 17% | 56% | 54% | 25% | 35% | 22% |
| Independence           | 97% | 1%  | 93% | 19% | 82% | 11% | 38% | 72% | 11% | 56% |

---

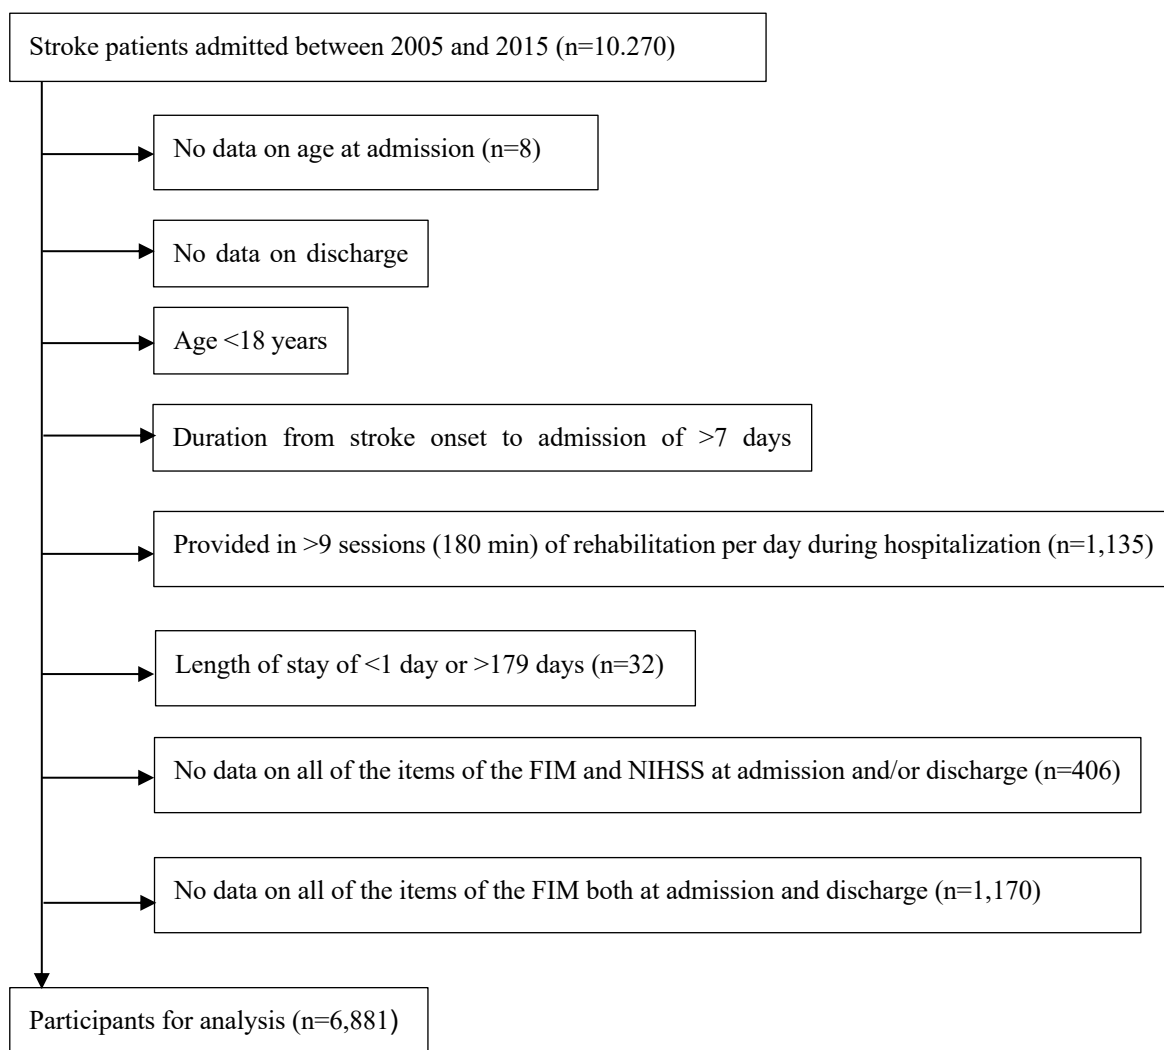

**Figure 1** Flow diagram of the patient selection process

The data source was the Japan Association of Rehabilitation Database
