1 **Title Page**

2

3 **Prediction of Overall Patient Characteristics that Incorporate Multiple Outcomes in**

4 **Acute Stroke: Latent Class Analysis**

5

6 **Short Title:** Prediction of Overall Patient Characteristics

7

8 Junya Uchida, OT<sup>1,2†</sup>, BS (co-first author); Moeka Yamada OT<sup>1,3†</sup>, BS (co-first author);

9 Hirofumi Nagayama, OT, PhD<sup>1\*†</sup> (co-first author); Kounosuke Tomori, OT, PhD<sup>4</sup>; Kohei

10 Ikeda, OT, PhD<sup>1</sup>; Keita Yamauchi MD, PhD<sup>5</sup>

11

12 <sup>1</sup>Department of Occupational Therapy, Kanagawa University of Human Services,

13 Yokosuka, Japan

14 <sup>2</sup>Department of Rehabilitation Therapy, Saiseikai Higashikanagawa Rehabilitation Hospital,

15 Yokohama, Japan

16 <sup>3</sup>Department of Occupational Therapy, Shinyokohama Rehabilitation Hospital, Yokohama,

17 Japan

18 <sup>4</sup>Department of Occupational Therapy, Tokyo University of Technology, Tokyo, Japan

19 <sup>5</sup>Graduate School of Health Management, Keio University, Fujisawa, Japan

20

21 <sup>†</sup>These authors contributed equally to this work.

22

23 **\*Corresponding Author:**

24 Hirofumi Nagayama

25 Department of Occupational Therapy, Kanagawa University of Human Services,

26 1-10-1 Heiseicho, Yokosuka, Kanagawa, 238-8522 Japan

27 Tel: +81-46-828-2724

28 Fax: +81-46-828-2725

29 E-mail: [hirofuminagayama@gmail.com](mailto:hirofuminagayama@gmail.com)

30

31 **Word Count:** 6,015 words

32

33

34

35 **Abstract**

36 **Background:** Previous prediction models have predicted a single outcome (e.g. gait) from  
37 several patient characteristics at one point (e.g. on admission). However, in clinical practice,  
38 it is important to predict an overall patient characteristic by incorporating multiple outcomes.  
39 This study aimed to develop a prediction model of overall patient characteristics in acute  
40 stroke patients using latent class analysis.

41 **Methods:** This retrospective observational study analyzed stroke patients admitted to acute  
42 care hospitals (37 hospitals, N=10,270) between January 2005 and March 2016 from the  
43 Japan Association of Rehabilitation Database. Overall, 6,881 patients were classified into  
44 latent classes based on their outcomes. The prediction model was developed based on patient  
45 characteristics and functional ability at admission. We selected the following outcome  
46 variables at discharge for classification using latent class analysis: Functional Independence  
47 Measure (functional abilities and cognitive functions), subscales of the National Institutes of  
48 Health Stroke Scale (upper extremity function), length of hospital stay, and discharge  
49 destination. The predictor variables were age, Functional Independence Measure (functional  
50 abilities and comprehension), subscales of the National Institutes of Health Stroke Scale  
51 (upper extremity function), stroke type, and amount of rehabilitation (physical, occupational,  
52 and speech therapies) per day during hospitalization.

53 **Results:** Patients (N=6,881) were classified into nine classes based on latent class analysis  
54 regarding patient characteristics at discharge (class size: 4–29%). Class 1 was the mildest  
55 (shorter stay and highest possibility of home discharge), and Class 2 was the most severe  
56 (longer stay and the highest possibility of transfers including deaths). Different gradations  
57 characterized Classes 3–9; these patient characteristics were clinically acceptable. Predictor

58 variables at admission that predicted class membership were significant (odds ratio: 0.0–  
59 107.9,  $P < .001$ ).

60 **Conclusions:** Based on these findings, the model developed in this study could predict an  
61 overall patient characteristic combining multiple outcomes, helping determine the appropriate  
62 rehabilitation intensity. In actual clinical practice, internal and external validation is required.

63

64

#### 65 **Non-standard Abbreviations and Acronyms**

66 ADLs; activities of daily living

67 LCA; latent class analysis

68 FIM; Functional Independence Measure

69 NIHSS; National Institutes of Health Stroke Scale

70 **Introduction**

71 Annually, 15 million people worldwide suffer from stroke, resulting in five million deaths  
72 and five million developing stroke-related disabilities.<sup>1)</sup> Rehabilitation services are included  
73 as the indispensable mechanism that encourages functional recovery and independence in  
74 acute stroke patients.<sup>2)</sup> A formal assessment of activities of daily living (ADLs), instrumental  
75 ADLs, communication abilities, and functional mobility is recommended for the  
76 rehabilitation of stroke patients before discharge. The findings should be incorporated into the  
77 care transition and discharge planning process.<sup>2, 3)</sup> In addition, when considering a discharge  
78 destination from the acute setting, clinicians consider a patient's prognosis of functional  
79 recovery as the most critical factor.<sup>4, 5)</sup> Therefore, predicting a patient's condition at discharge  
80 based on the assessment results at admission can provide a valuable contribution to  
81 personalized rehabilitation plans.

82 A recent review<sup>6)</sup> reported that several tools had been developed to predict the outcomes for  
83 independence,<sup>7-9)</sup> upper extremity function,<sup>10, 11)</sup> gait,<sup>12-17)</sup> and swallowing.<sup>18, 19)</sup> These  
84 previous studies have predicted a single outcome based on multiple variables. However, from  
85 a clinical perspective, it is crucial to predict overall patient characteristics, incorporating  
86 multiple outcomes at discharge, not just a single outcome. Overall patient characteristics  
87 might be, for example, a patient is expected to be able to walk independently but may need  
88 assistance with communication and cognitive function. Despite the importance of predicting  
89 overall patient characteristics, previous studies have not developed such a comprehensive  
90 prediction model, leaving the problem unresolved. Therefore, developing a prediction model  
91 of overall patient characteristics at discharge in acute stroke patients will provide a new  
92 solution to a problem previous prediction models have not solved.

93 We employed latent class analysis (LCA) to solve these problems. LCA is a subset of  
94 structural equation modeling that categorizes heterogeneous classes (segments) from the  
95 study population by associating manifest variables with notions (latent variables) that cannot  
96 be directly measured.<sup>20)</sup> LCA is useful when differences in the underlying distributions  
97 among variables contribute to heterogeneity within a study population.<sup>21)</sup> Using LCA, it is  
98 possible to identify classes of overall patient characteristics (such as discharge destination,  
99 physical function, functional abilities, and length of stay) at discharge and to develop a model  
100 that predicts which class the patient belongs based on their characteristics at admission.  
101 Therefore, this study aimed to develop a prediction model of overall patient characteristics in  
102 acute stroke patients using LCA. This prediction model has the potential to predict  
103 conventional functional status and determine appropriate rehabilitation intensity levels  
104 (amount of rehabilitation per day) for individual patients.

105

## 106 **Methods**

107 We conducted a retrospective observational study using the Japan Association of  
108 Rehabilitation Database.<sup>22, 23)</sup> The need for informed consent was waived because all data  
109 were de-identified. The study was approved by the ethics committee of the Kanagawa  
110 University of Human Services (No. 7-20-30).

111

## 112 ***Database***

113 Data from the Japan Association of Rehabilitation Database, voluntarily sampled from  
114 patients admitted to participating hospitals between January 2005 and March 2016,<sup>22-24)</sup> were  
115 obtained retrospectively. The data were separated into different categories based on the  
116 diagnosis and stage, such as stroke in the medical ward, stroke in the convalescent

117 rehabilitation ward, and other conditions. The National Institutes of Health Stroke Scale  
118 (NIHSS) and Functional Independence Measure (FIM) scores, patient age, stroke type,  
119 severity, rehabilitation type, and rehabilitation length are all recorded in the stroke database.  
120 Data from 33,657 patients were collected in 2016, when 80 hospitals participated in the study.  
121 All data gathered on stroke patients admitted to acute care hospitals (37 hospitals, N=10,270)  
122 between the time of admission and discharge were used in this study.

123

## 124 ***Participants***

### 125 *Inclusion Criteria*

126 The inclusion criteria of this study were (1) patients with acute stroke admitted to registered  
127 hospitals in the Japan Association of Rehabilitation Database between 2005 and 2015, (2)  
128 those who were aged  $\geq 18$  years, and (3) those provided with rehabilitation (physical,  
129 occupational, and speech therapy).

### 130 *Exclusion Criteria*

131 The exclusion criteria were (1) no data on age at admission, (2) no data on the discharge  
132 destination, (3) age  $< 18$  years, (4) no rehabilitation provided during hospitalization, (5)  
133 duration from stroke onset to admission of  $> 7$  days, (6) rehabilitation for  $> 9$  units (180 min) a  
134 day during hospitalization, because, in the Japanese rehabilitation system, there is a limit of 9  
135 units daily for rehabilitation. Therefore, assuming that a patient receiving  $> 9$  units a day is  
136 undergoing a normal rehabilitation program is difficult. (7) length of stay of  $< 1$  day or  $> 179$   
137 days, (8) no data on all of the items of the FIM and NIHSS at admission and/or discharge,  
138 and (9) no data on all of the items of the FIM both at admission and discharge.

139

## 140 ***Outcome Variables at Discharge***

141 Based on previous studies and clinical perspectives, we selected the following outcome  
142 variables at discharge for classification using LCA: functional abilities, cognitive functions,  
143 upper extremity function, length of hospital stay, and discharge destination.

144 The FIM assessed functional abilities at discharge. The FIM includes 18 items to determine  
145 the amount of assistance for a person with a disability to perform daily activities safely and  
146 effectively.<sup>25)</sup> All items were scored using a 7-point scale: 1, total assistance; 2, maximum  
147 assistance; 3, moderate assistance; 4, minimal assistance; 5, supervision; 6, modified  
148 independence; and 7, complete independence. Based on previous studies,<sup>26, 27)</sup> we classified  
149 these seven scales into three groups: complete dependence (1–2), modified dependence (3–5),  
150 and independence (6–7). Outcome variables extracted as functional abilities were eating,  
151 transfer (bed/chair/wheelchair), toileting, locomotion (walk/wheelchair), and transfer  
152 (shower/bathtub).

153 Cognitive functions were also described referring to the cognitive subscale of the FIM. Three  
154 items of the FIM cognitive subscale were extracted: comprehension, expression, and social  
155 interaction. Social interaction was identified as a significant predictor of the post-  
156 rehabilitation destinations in acute stroke patients.<sup>28)</sup> Patients with deficits in comprehension  
157 could constitute serious problems in their homes despite the support of their families because  
158 they might not be able to understand the provided information.<sup>29)</sup>

159 The upper extremity function was collected from the score on the motor arm, one of the  
160 NIHSS subscales. The NIHSS is a scale highly widely used in modern neurology that rates  
161 deficits.<sup>30)</sup> The score of the motor arm is from 0 to 4. A high score on this item indicates  
162 severe impairment in the patient's upper extremities.

163 Length of hospital stay varies from patient to patient, depending on the stroke's severity, the  
164 patient's background influencing their discharge destination, and other factors. Therefore, it



165 was classified into the following four categories: 1–14 days, 15–28 days, 29–42 days, and  
166  $\geq 43$  days.

167 Discharge destinations confirmed in the dataset were grouped into five groups: home,  
168 different hospitals, facilities, death, and others.

169

### 170 *Predictor Variables*

171 In this study, the predictor variables were the patient characteristics and functional ability at  
172 admission, expected to contribute to classification at discharge from previous studies and  
173 clinical perspectives. They include age, functional abilities, comprehension, upper extremity  
174 function, type of stroke, and the daily amount of rehabilitation (physical, occupational, and  
175 speech therapies) during hospitalization.

176 We have included the following functional outcomes in FIM items: eating,<sup>28, 31)</sup> locomotion  
177 (walk/wheelchair),<sup>32)</sup> and comprehension.<sup>29, 33)</sup> Stroke patients had a higher possibility of  
178 being discharged home if admitted with a higher motor FIM score and a lower chance of  
179 being discharged home if they were older or had a cognitive defect.<sup>34)</sup> FIM toileting was one  
180 of the initial items that predicted disposition in acute stroke patients.<sup>31)</sup> Based on the motor  
181 FIM score at admission, there was a correlation between locomotion gain and other self-care  
182 in stroke patients. A variation in locomotion gain influenced the improvement in self-care.<sup>32)</sup>  
183 In addition, aphasia was identified as a strong prognostic factor in post-stroke outcomes.<sup>33)</sup>  
184 Furthermore, deficits in auditory comprehension, reading comprehension, and oral spelling to  
185 dictation were associated with a higher possibility of discharge to a setting other than  
186 home.<sup>29)</sup>

187 The use of the NIHSS score as an early predictor of outcome following acute hospitalization  
188 for stroke has received support.<sup>35)</sup> The NIHSS score of the affected upper extremity assessed

189 at admission was associated with long-term functional outcomes evaluated using the FIM in  
190 patients with middle cerebral artery infarction.<sup>36)</sup>

191 The types of stroke confirmed in the dataset were grouped into the following eight categories:  
192 lacunar infarction, atherothrombotic cerebral infarction, cardiogenic embolism, cerebral  
193 infarction (others/unknown), hypertensive cerebral hemorrhage, cerebral hemorrhage  
194 (others/unknown), subarachnoid hemorrhage, and others/unknown.

195 Regarding the amount of daily rehabilitation, following Japanese health insurance guidelines,  
196 20-minute rehabilitation (physical, occupational, and speech therapies) is defined as 1 unit.  
197 This study categorized the amount of daily rehabilitation provided for each patient available  
198 on the dataset into four groups: <2 units (<40 min),  $\geq 2$ –<4 units (40–80 min),  $\geq 4$ –<6 units  
199 (80–120 min), and  $\geq 6$  units (>120 min).

200

## 201 *Statistical Analyses*

202 We used the two-step method proposed by Bakk and Kuha<sup>37)</sup> in developing a prediction  
203 model of LCA for the patient characteristics at discharge. When developing a prediction  
204 model, this method has less bias than other methods and is recommended even when missing  
205 values exist.<sup>38-40)</sup> The two-step method comprises the following steps: 1) to fit the latent class  
206 measurement model on its own and 2) to maximize the joint likelihood with the measurement  
207 model's parameters and exogenous latent variables' parameters fixed at the first step's  
208 estimated values, allowing only the structural model's remaining parameters to be estimated  
209 in the second step.<sup>37)</sup>

210 In the first step, we conducted an LCA with our selected outcome variables to identify the  
211 patient's condition at discharge. The optimal latent model for the number of latent classes was  
212 determined using a combination of Bayesian information criterion (BIC), entropy, Vuong-Lo-

213 Mendell-Rubin, and class size.<sup>41, 42)</sup> For the second step, we estimated a prediction model for  
214 the calculated classes in the first step with our selected predictor variables of the patient  
215 condition at admission. In addition, we processed missing data by employing full information  
216 maximum likelihood default in Latent GOLD®6.0.<sup>43, 44)</sup> We used the Latent GOLD®6.0  
217 (Statistical Innovations, Arlington, MA, USA) for LCA and the calculation of prediction  
218 models. The significance level was set at  $P < .05$ .

219

## 220 **Results**

### 221 *Patient Characteristics*

222 After applying the inclusion and exclusion criteria in this study, 6,881 patients were included  
223 (Figure 1), and baseline characteristics at admission and discharge are summarized in Table 1.  
224 The mean age at admission was 73.7 years, and the average length of stay was 29.5 days. The  
225 total FIM scores, scores of all FIM subitems, and scores of the NIHSS improved at discharge  
226 from admission.

227

### 228 *Latent Classes of Patient Characteristics at Discharge*

229 Overall, 6,881 patients were classified into latent classes using LCA based on their outcomes.  
230 Latent class models with 1–12 classes were examined to select the best latent class. Model-fit  
231 statistics for LCA models with 1–12 classes are shown in Table 2. The difference in BIC/AIC  
232 fit between the models showed that it began to decline in the nine-class model. The smallest  
233 class size was <5% after the nine-class model.

234 In determining the number of classes, one occupational therapist and two occupational  
235 therapy students selected the nine-class model for this study, based on the interpretability of  
236 the class characteristics, given that a minimum class size of at least 5% is recommended.<sup>42)</sup>  
237 Table 3 shows the class sizes and item response probabilities for the outcomes at discharge  
238 within each class. For example, a class size of 29% for Class 1 indicates that 29% of all  
239 patients belong to this class and that 97% of the patients within Class 1 would return home as  
240 “Discharge destination.” The overall characteristics of each class indicated that Class 1 was  
241 the mildest (shorter length of stay and the highest possibility of home discharge), and Class 2  
242 was the most severe (longer length of stay and the highest possibility of transfers, including  
243 deaths). Different gradations characterized classes 3–9; these patient characteristics were  
244 clinically acceptable.

245

#### 246 *Predictors of Class Membership*

247 All predictors of patient characteristics at admission were significant enough to predict  
248 outcomes at discharge ( $P < .01$ ), and the standard R-squared, which indicates the goodness-of-  
249 fit of the prediction model, was 0.3383 (Table S1, S2). Relatively stronger predictors  
250 relative to Class 1 (maximum odds ratio was  $>10.0$  in a single predictor) were the right/left  
251 motor arm of the NIHSS score. In particular, Class 8 showed extremely high odds of  
252 belonging if the left motor arm of the NIHSS score was 4. Additionally, Class 9 also showed  
253 particularly high odds if the right motor arm of the NIHSS score was 4. Furthermore,  
254 regarding the amount of daily rehabilitation, the odds ratio tended to decrease in the severe  
255 class and increase in the mild class as the amount of rehabilitation increased. However, this  
256 was not always the case.

257

258 ***Model Application***

259 Our prediction model can predict the overall patient characteristics of acute stroke patients at  
260 discharge (Video S1). The predicted results can allow practitioners to provide appropriate  
261 interventions that maximize effectiveness. Our made-up example for the model application is  
262 a patient aged 85 with a cardiogenic embolism and a severe disability on the right side of the  
263 body. The patient is provided 4–6 units (80–120 min) of rehabilitation daily and requires  
264 modified to complete assistance with ADLs. According to the predicted probability, the  
265 patient has the highest possibility of transfer and right moderate upper extremity disability at  
266 discharge. The patient is predicted to require modified to complete assistance with ADLs and  
267 complete assistance with communication and social interaction.

268

269 **Discussion**

270 This study used LCA to classify acute stroke patients based on the overall patient condition at  
271 discharge. We also developed a model to predict their class based on patient characteristics at  
272 admission. The results showed that overall patient conditions at discharge were classified into  
273 nine classes, and all the selected predictors at admission were significantly associated with  
274 class memberships. This model was innovative in predicting the overall patient outcomes,  
275 which previous models have been unable to resolve, including the appropriate rehabilitation  
276 intensity and length of stay.

277 As for the predictors of this study, age, functional abilities, comprehension, upper extremity  
278 function, stroke type, and amount of rehabilitation (physical, occupational, and speech  
279 therapies) per day during hospitalization were significantly associated with class membership  
280 at discharge. These results were similar to those of previous studies.<sup>33, 34, 36, 45)</sup>

281 There are two points of particular note in this study's findings. The first point was that the  
282 severity of the left and right upper extremities paralysis at admission had different patient  
283 characteristics at discharge. This study showed that Classes 6 and 8 were characterized as  
284 severe to moderate paralysis of the left upper extremity at discharge. Communication in these  
285 classes ranged from independence to modified dependence, although ADLs such as self-care  
286 were modified to complete dependence. These may be due to the influence of unilateral  
287 spatial neglect, which may be a factor causing the need for assistance with ADLs.<sup>46, 47)</sup> In  
288 addition, Class 9 was characterized as severe to moderate paralysis of the right upper  
289 extremity at the discharge. In this class, communication was complete dependence, and ADLs  
290 such as self-care ranged from modified to complete dependence. These may be due to the  
291 influence of aphasia, which may cause difficulties with communication.<sup>48)</sup> These results were  
292 clinically convincing, and appropriate rehabilitation could be provided by addressing these  
293 factors from the early stages of admission.

294 The second point was the intensity of rehabilitation. In some classes, a higher intensity of  
295 rehabilitation did not necessarily lead to better outcomes. It is necessary to reconsider the  
296 currently accepted philosophy "more practice is always better," particularly in the first days  
297 after a stroke.<sup>49)</sup> The model developed in this study also improves the calculation of how the  
298 overall outcome at discharge is affected by the intensity of provided rehabilitation. Therefore,  
299 by using the model of this study, providing individualized rehabilitation with its intensity  
300 optimized for the patient's characteristics is possible.

301

### 302 *Limitations*

303 There were some limitations in this study. First, we did not conduct internal and external  
304 validation. A prediction model should be validated using original data to examine internal

305 validity through methods such as resampling (e.g., cross-validation and bootstrapping) and  
306 using other participants' data from the same or different institutions or periods to improve the  
307 model's validity (external validation).<sup>50)</sup> Therefore, before applying this prediction model to  
308 actual clinical practice, validation of this prediction model needs to be performed. Second,  
309 the dataset we referred to did not contain enough details about interventions provided for  
310 participants. Hence, the difference in interventions among participants might have influenced  
311 the LCA and prediction model results.

312 Third, other potential predictors that significantly influence the outcomes at discharge can be  
313 available at admission. However, in this study, we selected predictor variables according to  
314 the findings of as many previous studies as possible and our clinical viewpoint. Therefore, we  
315 consider the model the most applicable presently. The model will be more accurate if these  
316 issues are addressed in future validation studies.

317

## 318 **Conclusion**

319 In conclusion, we developed a prediction model of overall patient conditions, including the  
320 appropriate rehabilitation intensity in acute stroke patients using LCA. Before applying this  
321 model to actual clinical practice, internal and external validation would be required to  
322 improve its validity. Further studies could shed light on the potential influence of the  
323 predictors and the appropriate amount of rehabilitation for stroke patients, depending on their  
324 medical characteristics and severity.

325

## 326 **Acknowledgments**

327 We thank the rehabilitation patient database developed by the Japan Association of  
328 Rehabilitation Database for providing the data for this study. This study's results and

329 conclusions are the authors' views, not the official views of the Japanese Association of  
330 Rehabilitation Medicine. We also appreciate the participants, their families, and the  
331 associations involved in this study.

332

### 333 **Funding/Support**

334 This work was supported by JSPS KAKENHI (Grant number: JP20H03914).

335

### 336 **Conflict of Interest Disclosures**

337 The authors declare that the research was conducted without any commercial or financial  
338 relationships that could be construed as a potential conflict of interest.

339

### 340 **Supplemental Material**

341 Tables S1. Model fit of the prediction model

342 Table S2. Odds ratios (ORs) and p-values from the multivariate prediction of class  
343 membership (n=6,881)

344 Movie S1. Model application

345

346

347

348

349



350

351

352 **References**

- 353 1. World Health Organization. Stroke, Cerebrovascular accident. @whoemro.  
354 <http://www.emro.who.int/health-topics/stroke-cerebrovascular-accident/index.html>.  
355 Published 2023. Accessed 2/9, 2023.
- 356 2. Winstein CJ, Stein J, Arena R, Bates B, Cherney LR, Cramer SC, Deruyter F, Eng JJ,  
357 Fisher B, Harvey RL, et al. Guidelines for Adult Stroke Rehabilitation and Recovery:  
358 A Guideline for Healthcare Professionals From the American Heart  
359 Association/American Stroke Association. *Stroke*. 2016;47:e98–e169.
- 360 3. Powers WJ, Rabinstein AA, Ackerson T, Adeoye OM, Bambakidis NC, Becker K,  
361 Biller J, Brown M, Demaerschalk BM, Hoh B, et al. Guidelines for the Early  
362 Management of Patients With Acute Ischemic Stroke: 2019 Update to the 2018  
363 Guidelines for the Early Management of Acute Ischemic Stroke: A Guideline for  
364 Healthcare Professionals From the American Heart Association/American Stroke  
365 Association. *Stroke*. 2019;50:e344–e418.
- 366 4. Cormier DJ, Frantz MA, Rand E, Stein J. Psychiatrist referral preferences for  
367 postacute stroke rehabilitation. *Medicine (Baltimore)*. 2016;95:e4356.
- 368 5. Kennedy GM, Brock KA, Lunt AW, Black SJ. Factors influencing selection for  
369 rehabilitation after stroke: A questionnaire using case scenarios to investigate  
370 physician perspectives and level of agreement. *Arch Phys Med Rehabil*.  
371 2012;93:1457–1459.
- 372 6. Stinear CM, Smith M-C, Byblow WD. Prediction tools for stroke rehabilitation.  
373 *Stroke*. 2019;50:3314–3322.

- 374 7. de Ridder IR, Dijkland SA, Scheele M, den Hertog HM, Dirks M, Westendorp WF,  
375 Nederkoorn PJ, van de Beek D, Ribbers GM, Steyerberg EW, et al. Development and  
376 validation of the Dutch Stroke Score for predicting disability and functional outcome  
377 after ischemic stroke: A tool to support efficient discharge planning. *Eur Stroke J*.  
378 2018;3:165–173.
- 379 8. Douiri A, Grace J, Sarker SJ, Tilling K, McKeivitt C, Wolfe CD, Rudd AG. Patient-  
380 specific prediction of functional recovery after stroke. *Int J Stroke*. 2017;12:539–548.
- 381 9. Scrutinio D, Lanzillo B, Guida P, Mastropasqua F, Monitillo V, Pusineri M, Formica  
382 R, Russo G, Guarnaschelli C, Ferretti C, et al. Development and validation of a  
383 predictive model for functional outcome after stroke rehabilitation: The Maugeri  
384 model. *Stroke*. 2017;48:3308–3315.
- 385 10. Nijland RH, van Wegen EE, Harmeling-van der Wel BC, Kwakkel G, Investigators E.  
386 Presence of finger extension and shoulder abduction within 72 hours after stroke  
387 predicts functional recovery: early prediction of functional outcome after stroke: The  
388 EPOS cohort study. *Stroke*. 2010;41:745–750.
- 389 11. Stinear CM, Byblow WD, Ackerley SJ, Smith MC, Borges VM, Barber PA. PREP2:  
390 A biomarker-based algorithm for predicting upper limb function after stroke. *Ann*  
391 *Clin Transl Neurol*. 2017;4:811–820.
- 392 12. Bland MD, Sturmoski A, Whitson M, Connor LT, Fucetola R, Huskey T, Corbetta M,  
393 Lang CE. Prediction of discharge walking ability from initial assessment in a stroke  
394 inpatient rehabilitation facility population. *Arch Phys Med Rehabil*. 2012;93:1441–  
395 1447.

- 396 13. Kinoshita S, Abo M, Okamoto T, Tanaka N. Utility of the revised version of the  
397 ability for basic movement scale in predicting ambulation during rehabilitation in  
398 poststroke patients. *J Stroke Cerebrovasc Dis.* 2017;26:1663–1669.
- 399 14. Kwah LK, Harvey LA, Diong J, Herbert RD. Models containing age and NIHSS  
400 predict recovery of ambulation and upper limb function six months after stroke: An  
401 observational study. *J Physiother.* 2013;59:189–197.
- 402 15. Sánchez-Blanco I, Ochoa-Sangrador C, López-Munaín L, Izquierdo-Sánchez M,  
403 Fermoso-Garcia J. Predictive model of functional independence in stroke patients  
404 admitted to a rehabilitation programme. *Clin Rehabil.* 1999;13:464–475.
- 405 16. Smith M-C, Barber PA, Stinear CM. The TWIST algorithm predicts time to walking  
406 independently after stroke. *Neurorehabil Neural Repair.* 2017;31:955–964.
- 407 17. Veerbeek JM, Van Wegen EE, Harmeling-Van der Wel BC, Kwakkel G, Investigators  
408 E. Is accurate prediction of gait in nonambulatory stroke patients possible within 72  
409 hours poststroke? The EPOS study. *Neurorehabil Neural Repair.* 2011;25:268–274.
- 410 18. Faigle R, Marsh EB, Llinas RH, Urrutia VC, Gottesman RF. Novel score predicting  
411 gastrostomy tube placement in intracerebral hemorrhage. *Stroke.* 2015;46:31–36.
- 412 19. Galovic M, Stauber AJ, Leisi N, Krammer W, Brugger F, Vehoff J, Balcerak P,  
413 Muller A, Muller M, Rosenfeld J, et al. Development and validation of a prognostic  
414 model of swallowing recovery and enteral tube feeding after ischemic stroke. *JAMA*  
415 *Neurology.* 2019;76:561–570.
- 416 20. Formann AK, Kohlmann T. Latent class analysis in medical research. *Stat Methods*  
417 *Med Res.* 1996;5:179–211.

- 418 21. Kongsted A, Nielsen AM. Latent class analysis in health research. *J Physiother.*  
419 2017;63:55–58.
- 420 22. Kinoshita S, Kakuda W, Momosaki R, Yamada N, Sugawara H, Watanabe S, Abo M.  
421 Clinical management provided by board-certificated physiatrists in early  
422 rehabilitation is a significant determinant of functional improvement in acute stroke  
423 patients: A retrospective analysis of Japan rehabilitation database. *J Stroke*  
424 *Cerebrovasc Dis.* 2015;24:1019–1024.
- 425 23. Jeong S, Kondo K, Shiraishi N, Inoue Y. An evaluation of the quality of post-stroke  
426 rehabilitation in Japan. *Clinical Audit.* 2010;2:59–66.
- 427 24. Kamo T, Momosaki R, Suzuki K, Asahi R, Azami M, Ogihara H, Nishida Y.  
428 Effectiveness of intensive rehabilitation therapy on functional outcomes after stroke:  
429 A propensity score analysis based on Japan Rehabilitation Database. *J Stroke*  
430 *Cerebrovasc Dis.* 2019;28:2537–2542.
- 431 25. Ottenbacher KJ, Hsu Y, Granger CV, Fiedler RC. The reliability of the functional  
432 independence measure: A quantitative review. *Arch Phys Med Rehabil.*  
433 1996;77:1226–1232.
- 434 26. Furuta H, Mizuno K, Unai K, Ebata H, Yamauchi K, Watanabe M. Functional  
435 Independence Measure subtypes among inpatients with subacute stroke:  
436 Classification via latent class analysis. *Prog Rehabil Med.* 2022;7:20220021.
- 437 27. Pedersen AR, Severinsen K, Nielsen JF. The effect of age on rehabilitation outcome  
438 after traumatic brain injury assessed by the Functional Independence Measure (FIM).  
439 *Neurorehabil Neural Repair.* 2014;29:299–307.

- 440 28. Aoki K, Iguchi A, Watabe T. Evaluation of Functional Independence Measure item  
441 scores for predicting home discharge after acute stroke rehabilitation. *Japanese*  
442 *Journal of Comprehensive Rehabilitation Science*. 2020;11:17–20.
- 443 29. González-Fernández M, Christian AB, Davis C, Hillis AE. Role of aphasia in  
444 discharge location after stroke. *Arch Phys Med Rehabil*. 2013;94:851–855.
- 445 30. Lyden P. Using the National Institutes of Health Stroke Scale. *Stroke*. 2017;48:513–  
446 519.
- 447 31. Mauthe RW, Haaf DC, Haya P, Krall JM. Predicting discharge destination of stroke  
448 patients using a mathematical model based on six items from the functional  
449 independence measure. *Arch Phys Med Rehabil*. 1996;77:10–13.
- 450 32. Kimura T. Interaction between locomotion and self-care for patients with stroke in  
451 severity classification based on the motor Functional Independence Measure upon  
452 admission to the recovery ward. *Open J Ther Rehabil*. 2020;08:164–182.
- 453 33. Gialanella B, Bertolinelli M, Lissi M, Prometti P. Predicting outcome after stroke:  
454 The role of aphasia. *Disabil Rehabil*. 2011;33:122–129.
- 455 34. Nguyen VQ, PrvuBettger J, Guerrier T, Hirsch MA, Thomas JG, Pugh TM, Rhoads  
456 CF 3rd. Factors associated with discharge to home versus discharge to institutional  
457 care after inpatient stroke rehabilitation. *Arch Phys Med Rehabil*. 2015;96:1297–  
458 1303.
- 459 35. Schlegel D, Kolb SJ, Luciano JM, Tovar JM, Cucchiara BL, Liebeskind DS, Kasner  
460 SE. Utility of the NIH Stroke Scale as a predictor of hospital disposition. *Stroke*.  
461 2003;34:134–137.

- 462 36. Saito J, Koyama T, Domen K. Long-term outcomes of FIM motor items predicted  
463 from acute stage NIHSS of patients with middle cerebral artery infarct. *Ann Rehabil*  
464 *Med.* 2018;42:670–681.
- 465 37. Bakk Z, Kuha J. Two-step estimation of models between latent classes and external  
466 variables. *Psychometrika.* 2018;83:871–892.
- 467 38. Vermunt JK, Magidson J. How to perform three-step latent class analysis in the  
468 presence of measurement non-invariance or differential item functioning. *Struct Equ*  
469 *Modeling.* 2020;28:356–364.
- 470 39. Alagöz ÖEC, Vermunt JK. Stepwise latent class analysis in the presence of missing  
471 values on the class indicators. *Struct Equ Modeling.* 2022;29:784–790.
- 472 40. Janssen JHM, van Laar S, de Rooij MJ, Kuha J, Bakk Z. The detection and modeling  
473 of direct effects in latent class analysis. *Struct Equ Modeling.* 2018;26:280–290.
- 474 41. Nylund KL, Asparouhov T, Muthén BO. Deciding on the number of classes in latent  
475 class analysis and growth mixture modeling: A Monte Carlo simulation study. *Struct*  
476 *Equ Modeling.* 2007;14:535–569.
- 477 42. Weller BE, Bowen NK, Faubert SJ. Latent class analysis: A guide to best practice. *J*  
478 *Black Psychol.* 2020;46:287–311.
- 479 43. Edwards SL, Berzofsky ME, Biemer PP. RTI Press Methods Report Series. In:  
480 *Addressing Nonresponse for Categorical Data Items Using Full Information*  
481 *Maximum Likelihood with Latent GOLD 5.0.* Research Triangle Park (NC): RTI  
482 Press © 2018 Research Triangle Institute. All rights reserved.; 2018.
- 483 44. Vermunt JK, Magidson J. *Upgrade Manual for Latent GOLD Basic, Advanced,*  
484 *Syntax, and Choice Version 6.0.* Arlington. MA: Statistical Innovations Inc.; 2021.

- 485 45. Wee JY, Hopman WM. Stroke impairment predictors of discharge function, length of  
486 stay, and discharge destination in stroke rehabilitation. *Am J Phys Med Rehabil.*  
487 2005;84:604–612.
- 488 46. Doron N, Rand D. Is unilateral spatial neglect associated with motor recovery of the  
489 affected upper extremity poststroke? A systematic review. *Neurorehabil Neural*  
490 *Repair.* 2019;33:179–187.
- 491 47. Ten Brink AF, Verwer JH, Biesbroek JM, Visser-Meily JMA, Nijboer TCW.  
492 Differences between left- and right-sided neglect revisited: A large cohort study  
493 across multiple domains. *J Clin Exp Neuropsychol.* 2017;39:707–723.
- 494 48. Gialanella B, Ferlucci C. Functional outcome after stroke in patients with aphasia  
495 and neglect: Assessment by the motor and cognitive functional independence  
496 measure instrument. *Cerebrovas Dis.* 2010;30:440–447.
- 497 49. Bernhardt J, Churilov L, Ellery F, Collier J, Chamberlin J, Langhorne P, Lindley RI,  
498 Moodie M, Dewey H, Thrift AG, et al. Prespecified dose-response analysis for A  
499 Very Early Rehabilitation Trial (AVERT). *Neurology.* 2016;86:2138–2145.
- 500 50. Iwagami M, Matsui H. Introduction to clinical prediction models. *Ann Clin*  
501 *Epidemiol.* 2022;4:72–80

502  
503

#### 504 **Figure Legend**

505 **Figure 1** Flow diagram of the patient section process

506 The data source was the Japan Association of Rehabilitation Database

507

508 Table 1. Patient Characteristics of the Study

| Continuous variable                                           | Mean (SD)        |                  |
|---------------------------------------------------------------|------------------|------------------|
| Age, in years                                                 | 73.7 (12.7)      |                  |
| Length of stay, days                                          | 29.5 (21.4)      |                  |
|                                                               | <b>Admission</b> | <b>Discharge</b> |
| <b>Motor-FIM</b> (admission: N=6,751, discharge: N=6,652)     | 33.4 (23.5)      | 57.0 (29.7)      |
| <b>Cognitive-FIM</b> (admission: N=6,774, discharge: N=6,676) | 20.8 (11.4)      | 24.1 (10.7)      |
| <b>FIM (total)</b> (admission: N=6,821, discharge: N=6,726)   | 54.2 (32.6)      | 80.9 (39.1)      |
| <b>NIHSS (total)</b> (admission: N=6,575, discharge: N=6,544) | 8.3 (8.9)        | 6.2 (8.2)        |
| Category variable                                             | N (%)            |                  |
| <b>Sex</b> Female                                             | 3,046 (44.3%)    |                  |
| <b>Type of stroke</b>                                         |                  |                  |
| Lacunar infarction                                            | 1,091 (15.9%)    |                  |
| Atherothrombotic cerebral infarction                          | 1,697 (24.7%)    |                  |
| Cardiogenic embolism                                          | 1,138 (16.5%)    |                  |
| Cerebral infarction (Others/unknown)                          | 614 ( 8.9%)      |                  |
| Hypertensive cerebral hemorrhage                              | 1,169 (17.0%)    |                  |
| Cerebral hemorrhage (Others/unknown)                          | 400 (5.8%)       |                  |



Subarachnoid hemorrhage 339 (4.9%)

Others/Unknown 60 (0.9%)

Missing 373 (5.4%)

**Amount of rehabilitation per day**

Less than 2 units (less than 40 min) 2,277 (33.1%)

2 or more to less than 4 units (40-80 min) 2,329 (33.8%)

4 or more to less than 6 units (80-120 min) 990 (14.4%)

6 or more units (more than 120 min) 1,285 (18.7%)

**Admission Discharge**

**Motor arm of the NIHSS (right)**

0 4,011 4,657  
(58.3%) (67.7%)

1 889 584  
(12.9%) (8.5%)

2 433 (6.3%) 348  
(5.1%)

3 390 (5.7%) 345  
(5.0%)

4 687 466  
(10.0%) (6.8%)

Missing 471 (6.8%) 481  
(7.0%)

**Motor arm of the NIHSS (left)**

|                                         |                            |            |           |
|-----------------------------------------|----------------------------|------------|-----------|
|                                         | 0                          | 3,921      | 4,527     |
|                                         |                            | (57.0%)    | (65.8%)   |
|                                         | 1                          | 864        | 599       |
|                                         |                            | (12.6%)    | (8.7%)    |
|                                         | 2                          | 477 (6.9%) | 384       |
|                                         |                            |            | (5.6%)    |
|                                         | 3                          | 424 (6.2%) | 371       |
|                                         |                            |            | (5.4%)    |
|                                         | 4                          | 723        | 519 7.5%) |
|                                         |                            | (10.5%)    |           |
|                                         | Missing                    | 472 (6.9%) | 481       |
|                                         |                            |            | (7.0%)    |
| <b>FIM locomotion (walk/wheelchair)</b> |                            |            |           |
|                                         | Complete dependence (1, 2) | 4,995      | 2,372     |
|                                         |                            | (72.6%)    | (34.5%)   |
|                                         | Modified dependence (3-5)  | 1,199      | 1,557     |
|                                         |                            | (17.4%)    | (22.6%)   |
|                                         | Independence (6, 7)        | 610 (8.9%) | 2,782     |
|                                         |                            |            | (40.4%)   |
|                                         | Missing                    | 77 (1.1%)  | 170       |
|                                         |                            |            | (2.5%)    |
| <b>FIM toileting</b>                    |                            |            |           |
|                                         | Complete dependence (1, 2) | 4,157      | 2,103     |
|                                         |                            | (60.4%)    | (30.6%)   |
|                                         | Modified dependence (3-5)  | 1,546      | 1,414     |

|                                      |            |         |
|--------------------------------------|------------|---------|
|                                      | (22.5%)    | (20.5%) |
| Independence (6, 7)                  | 1,099      | 3,198   |
|                                      | (16.0%)    | (46.5%) |
| Missing                              | 79 (1.1%)  | 166     |
|                                      |            | (2.4%)  |
| <b>FIM transfer (shower/bathtub)</b> |            |         |
| Complete dependence (1, 2)           | 6,128      | 2,982   |
|                                      | (89.1%)    | (43.3%) |
| Modified dependence (3-5)            | 390 (5.7%) | 1,841   |
|                                      |            | (26.8%) |
| Independence (6, 7)                  | 286 (4.2%) | 1,885   |
|                                      |            | (27.4%) |
| Missing                              | 77 (1.1%)  | 173     |
|                                      |            | (2.5%)  |
| <b>FIM transfers</b>                 |            |         |
| <b>(bed/chair/wheelchair)</b>        |            |         |
| Complete dependence (1, 2)           | 3,888      | 1,486   |
|                                      | (56.5%)    | (21.6%) |
| Modified dependence (3-5)            | 2,002      | 2,083   |
|                                      | (29.1%)    | (30.3%) |
| Independence (6, 7)                  | 921        | 3,146   |
|                                      | (13.4%)    | (45.7%) |
| Missing                              | 70 (1.0%)  | 166     |
|                                      |            | (2.4%)  |
| <b>FIM eating</b>                    |            |         |

|                            |           |         |
|----------------------------|-----------|---------|
| Complete dependence (1, 2) | 3,098     | 1,454   |
|                            | (45.0%)   | (21.1%) |
| Modified dependence (3-5)  | 1,163     | 1,044   |
|                            | (16.9%)   | (15.2%) |
| Independence (6, 7)        | 2,554     | 4,219   |
|                            | (37.1%)   | (61.3%) |
| Missing                    | 66 (1.0%) | 164     |
|                            |           | (2.4%)  |

### **FIM comprehension**

|                            |           |         |
|----------------------------|-----------|---------|
| Complete dependence (1, 2) | 1,805     | 1,130   |
|                            | (26.2%)   | (16.4%) |
| Modified dependence (3-5)  | 1,828     | 1,818   |
|                            | (26.6%)   | (26.4%) |
| Independence (6, 7)        | 3,153     | 3,740   |
|                            | (45.8%)   | (54.4%) |
| Missing                    | 95 (1.4%) | 193     |
|                            |           | (2.8%)  |

### **FIM expression**

|                            |           |         |
|----------------------------|-----------|---------|
| Complete dependence (1, 2) | 2,019     | 1,354   |
|                            | (29.3%)   | (19.7%) |
| Modified dependence (3-5)  | 1,730     | 1,645   |
|                            | (25.1%)   | (23.9%) |
| Independence (6, 7)        | 3,036     | 3,689   |
|                            | (44.1%)   | (53.6%) |
| Missing                    | 96 (1.4%) | 193     |

|                               |           |         |
|-------------------------------|-----------|---------|
|                               |           | (2.8%)  |
| <b>FIM social interaction</b> |           |         |
| Complete dependence (1, 2)    | 2,413     | 1,459   |
|                               | (35.1%)   | (21.2%) |
| Modified dependence (3-5)     | 1,474     | 1,462   |
|                               | (21.4%)   | (21.2%) |
| Independence (6, 7)           | 2,916     | 3,788   |
|                               | (42.4%)   | (55.1%) |
| Missing                       | 78 (1.1%) | 172     |
|                               |           | (2.5%)  |

---

Abbreviations: FIM, Functional Independence Measure (range, 18–126, higher = better); NIHSS, National Institutes of Health Stroke Scale (range, 0–42, higher = worse); N, number of participants; SD, standard deviation

509

510

511 Table 2. Model-fit Statistics for LCA Models with 1–12 Classes

|          | <b>LL</b> | <b>BIC</b> | <b>ΔBIC</b> | <b>AIC</b> | <b>ΔAIC</b> | <b>df</b> | <b>VLMR</b> | <b>Entropy R<sup>2</sup></b> | <b>Smallest class size</b> |
|----------|-----------|------------|-------------|------------|-------------|-----------|-------------|------------------------------|----------------------------|
| 1-Class  | -82978    | 166230     | -           | 166018     | -           | 6858      |             | 1.00                         | —                          |
| 2-Class  | -62502    | 125561     | 40669       | 125130     | 40888       | 6826      | 40952       | 0.94                         | 46%                        |
| 3-Class  | -56534    | 113907     | 11654       | 113257     | 11873       | 6794      | 11937       | 0.94                         | 25%                        |
| 4-Class  | -54963    | 111048     | 2859        | 110180     | 3078        | 6762      | 3142        | 0.92                         | 16%                        |
| 5-Class  | -53875    | 109155     | 1893        | 108068     | 2111        | 6730      | 2175        | 0.92                         | 13%                        |
| 6-Class  | -53000    | 107688     | 1467        | 106383     | 1685        | 6698      | 1749        | 0.92                         | 6.8%                       |
| 7-Class  | -52566    | 107102     | 586         | 105578     | 805         | 6666      | 869         | 0.91                         | 6.0%                       |
| 8-Class  | -52218    | 106688     | 414         | 104945     | 633         | 6634      | 697         | 0.88                         | 5.6%                       |
| 9-Class  | -51933    | 106403     | 286         | 104440     | 505         | 6602      | 569         | 0.88                         | 4.5%                       |
| 10-Class | -51763    | 106345     | 58          | 104164     | 277         | 6570      | 341         | 0.87                         | 1.5%                       |
| 11-Class | -51620    | 106341     | 3           | 103941     | 222         | 6538      | 286         | 0.87                         | 1.5%                       |
| 12-Class | -51498.6  | 106380     | -39         | 103763     | 178         | 6498      | 242         | 0.86                         | 1.4%                       |

<sup>a</sup>Based on model selection statistics, comparison of LCA models with different latent classes.

LCA, Latent class analysis; LL, Log-likelihood; BIC, Bayesian information criterion (lower values imply better model fit); AIC, Akaike information criterion (lower values imply better model fit); df, degree of freedom; VLMR, Vuong-Lo-Mendell-Rubin likelihood ratio test; Entropy, higher values imply better classification quality

512 Table 3. Class Sizes Belonging to Each Class and the Item Response Probabilities

|            | Class 1                                   | Class 2                          | Class 3                        | Class 4                        | Class 5                        | Class 6                            | Class 7                        | Class 8                            | Class 9                            | Over all |
|------------|-------------------------------------------|----------------------------------|--------------------------------|--------------------------------|--------------------------------|------------------------------------|--------------------------------|------------------------------------|------------------------------------|----------|
| Class size | <b>29%</b>                                | <b>15%</b>                       | <b>11%</b>                     | <b>10%</b>                     | <b>10%</b>                     | <b>9%</b>                          | <b>6%</b>                      | <b>6%</b>                          | <b>4%</b>                          |          |
|            | Discharge                                 | Discharge                        | Discharge                      | Discharge                      | Discharge                      | Discharge                          | Discharge                      | Discharge                          | Discharge                          |          |
|            | destination: Home                         | destination: different           | destination: Home/different    | destination: Different         | destination: Different         | destination: Different             | destination: home              | destination: Different             | destination: Different             |          |
|            | Length of stay: 1–14 days                 | Length of stay: ≥4               | Length of stay: 2–4            | Length of stay: 2–6            | Length of stay: 2–6            | Length of stay: ≥4                 | Length of stay: 1 day–6        | Length of stay: 2–6                | Length of stay: 2–6                |          |
| Summary    | Upper extremity function: Mild disability | Upper extremity function: Severe | Upper extremity function: Mild | Upper extremity function: Mild | Upper extremity function: Mild | Upper extremity function: Moderate | Upper extremity function: Mild | Upper extremity function: Moderate | Upper extremity function: Moderate |          |

|                                        |               |                     |                                     |                                            |                      |                                                                |                              |                              |
|----------------------------------------|---------------|---------------------|-------------------------------------|--------------------------------------------|----------------------|----------------------------------------------------------------|------------------------------|------------------------------|
| Functional                             | disability    | function:           | disability                          | disability                                 | disability           | disability                                                     | disability                   | disability                   |
| ability:                               | Functional    | Mild                | Functional                          | Functional                                 | (left)               | Functional                                                     | (left)                       | (right)                      |
| Independence                           | ability:      | disability          | ability:                            | ability:                                   | Functional           | ability:                                                       | Functional                   | Functional                   |
| Communication and social interaction : | Complete      | Functional          | Independence or modified dependence | Modified dependence (Eating: Independence) | Complete dependence  | Independence (Transfer of shower/bathtub: Modified dependence) | Modified/Complete dependence | Moderate/Complete dependence |
| Independence                           | interaction : | shower/bathtub:     | shower/bathtub:                     | social interaction :                       | social interaction : | Modified dependence                                            | Independence)                | Complete dependence          |
|                                        | Complete      | Modified dependence | Complete dependence                 | social interaction :                       | Modified dependence  | Communication and social interaction :                         | Independence                 | Complete dependence          |
|                                        |               | e)                  | e)                                  | Independence                               | e                    | social interaction                                             | Independence                 |                              |
|                                        |               | Communication and   | Communication and                   |                                            |                      |                                                                |                              |                              |



| Discharge destination            | social interaction |     | social interaction |     | : Modified dependence |     | : Modified dependence |     | : Modified dependence |     |
|----------------------------------|--------------------|-----|--------------------|-----|-----------------------|-----|-----------------------|-----|-----------------------|-----|
|                                  | 97%                | 4%  | 46%                | 30% | 35%                   | 7%  | 64%                   | 5%  | 9%                    | 46% |
| Home                             | 97%                | 4%  | 46%                | 30% | 35%                   | 7%  | 64%                   | 5%  | 9%                    | 46% |
| Transfer to a different hospital | 1%                 | 77% | 52%                | 61% | 60%                   | 82% | 33%                   | 91% | 81%                   | 48% |
| Transfer to a facility           | 1%                 | 7%  | 1%                 | 6%  | 4%                    | 7%  | 1%                    | 3%  | 7%                    | 4%  |
| Death                            | 0%                 | 7%  | 0%                 | 0%  | 0%                    | 1%  | 0%                    | 0%  | 0%                    | 1%  |
| Others                           | 1%                 | 5%  | 1%                 | 3%  | 1%                    | 3%  | 2%                    | 1%  | 3%                    | 2%  |

|                        |     |     |     |     |     |     |     |     |     |     |  |
|------------------------|-----|-----|-----|-----|-----|-----|-----|-----|-----|-----|--|
| Length of stay         |     |     |     |     |     |     |     |     |     |     |  |
| <2 weeks (1–14 days)   | 55% | 8%  | 6%  | 16% | 19% | 9%  | 21% | 5%  | 6%  | 24% |  |
| 2–4 weeks (15–28 days) | 35% | 19% | 50% | 40% | 40% | 28% | 42% | 33% | 34% | 35% |  |
| 4–6 weeks (29–42 days) | 7%  | 28% | 25% | 24% | 27% | 29% | 21% | 36% | 32% | 21% |  |
| >6 weeks (>42 days)    | 3%  | 44% | 19% | 21% | 14% | 35% | 16% | 27% | 28% | 20% |  |
| NIHSS score            |     |     |     |     |     |     |     |     |     |     |  |
| Right motor arm        |     |     |     |     |     |     |     |     |     |     |  |
| 0                      | 97% | 20% | 85% | 74% | 79% | 54% | 91% | 77% | 40% | 72% |  |
| 1                      | 3%  | 9%  | 11% | 17% | 13% | 17% | 5%  | 5%  | 15% | 9%  |  |
| 2                      | 0%  | 16% | 2%  | 4%  | 4%  | 13% | 1%  | 5%  | 14% | 6%  |  |

|                     |     |     |     |     |     |     |     |     |     |     |
|---------------------|-----|-----|-----|-----|-----|-----|-----|-----|-----|-----|
| 3                   | 0%  | 17% | 2%  | 4%  | 3%  | 9%  | 1%  | 9%  | 16% | 6%  |
| 4                   | 0%  | 37% | 1%  | 1%  | 1%  | 7%  | 1%  | 4%  | 15% | 8%  |
| Left motor arm      |     |     |     |     |     |     |     |     |     |     |
| 0                   | 96% | 24% | 81% | 77% | 72% | 37% | 96% | 35% | 84% | 70% |
| 1                   | 3%  | 11% | 12% | 15% | 14% | 12% | 2%  | 17% | 11% | 9%  |
| 2                   | 0%  | 15% | 3%  | 4%  | 6%  | 14% | 1%  | 16% | 4%  | 6%  |
| 3                   | 0%  | 16% | 2%  | 3%  | 6%  | 16% | 0%  | 19% | 0%  | 6%  |
| 4                   | 0%  | 35% | 1%  | 1%  | 2%  | 20% | 0%  | 14% | 0%  | 8%  |
| FiM item            |     |     |     |     |     |     |     |     |     |     |
| Eating              |     |     |     |     |     |     |     |     |     |     |
| Complete dependence | 0%  | 95% | 1%  | 7%  | 1%  | 47% | 0%  | 17% | 34% | 22% |
| Modified            | 0%  | 5%  | 3%  | 42% | 16% | 45% | 7%  | 39% | 45% | 16% |

|                                        |      |      |     |     |     |     |     |     |     |     |
|----------------------------------------|------|------|-----|-----|-----|-----|-----|-----|-----|-----|
| dependence                             |      |      |     |     |     |     |     |     |     |     |
| Independence                           | 100% | 1%   | 96% | 51% | 83% | 9%  | 93% | 44% | 22% | 62% |
| Transfer<br>(bed/chair/whe<br>elchair) |      |      |     |     |     |     |     |     |     |     |
| Complete                               | 0%   | 97%  | 0%  | 0%  | 0%  | 66% | 0%  | 27% | 3%  | 22% |
| dependence                             |      |      |     |     |     |     |     |     |     |     |
| Modified                               | 1%   | 3%   | 2%  | 97% | 88% | 34% | 7%  | 73% | 96% | 31% |
| dependence                             |      |      |     |     |     |     |     |     |     |     |
| Independence                           | 99%  | 0%   | 98% | 3%  | 12% | 0%  | 93% | 0%  | 1%  | 47% |
| Toileting                              |      |      |     |     |     |     |     |     |     |     |
| Complete                               | 0%   | 100% | 0%  | 11% | 3%  | 96% | 0%  | 69% | 54% | 32% |
| dependence                             |      |      |     |     |     |     |     |     |     |     |
| Modified                               | 0%   | 0%   | 5%  | 86% | 73% | 4%  | 13% | 31% | 46% | 21% |
| dependence                             |      |      |     |     |     |     |     |     |     |     |

|                                 |      |      |     |     |     |     |     |     |     |     |
|---------------------------------|------|------|-----|-----|-----|-----|-----|-----|-----|-----|
| Independence                    | 100% | 0%   | 95% | 3%  | 23% | 0%  | 87% | 0%  | 0%  | 47% |
| Locomotion<br>(walk/wheelchair) |      |      |     |     |     |     |     |     |     |     |
| Complete dependence             | 0%   | 99%  | 1%  | 27% | 15% | 97% | 1%  | 86% | 56% | 36% |
| Modified dependence             | 3%   | 1%   | 22% | 72% | 81% | 3%  | 32% | 13% | 44% | 23% |
| Independence                    | 97%  | 0%   | 78% | 1%  | 4%  | 0%  | 67% | 1%  | 0%  | 41% |
| Transfer<br>(shower/bathroom)   |      |      |     |     |     |     |     |     |     |     |
| Complete dependence             | 7%   | 100% | 5%  | 57% | 32% | 99% | 11% | 90% | 76% | 45% |
| Modified dependence             | 18%  | 0%   | 56% | 43% | 68% | 1%  | 57% | 10% | 24% | 27% |

|                                  |     |     |      |     |     |     |     |     |     |     |
|----------------------------------|-----|-----|------|-----|-----|-----|-----|-----|-----|-----|
| dependence                       |     |     |      |     |     |     |     |     |     |     |
| Independence                     | 75% | 0%  | 39%  | 0%  | 0%  | 0%  | 32% | 0%  | 0%  | 28% |
| Communication<br>(comprehension) |     |     |      |     |     |     |     |     |     |     |
| Complete dependence              | 0%  | 92% | 0%   | 2%  | 0%  | 4%  | 4%  | 0%  | 55% | 17% |
| Modified dependence              | 1%  | 8%  | 0%   | 92% | 4%  | 91% | 87% | 9%  | 43% | 27% |
| Independence                     | 99% | 0%  | 100% | 5%  | 96% | 5%  | 9%  | 91% | 2%  | 56% |
| Communication<br>(expression)    |     |     |      |     |     |     |     |     |     |     |
| Complete dependence              | 0%  | 99% | 0%   | 2%  | 0%  | 13% | 10% | 0%  | 80% | 21% |

|                     |     |     |     |     |     |     |     |     |     |     |
|---------------------|-----|-----|-----|-----|-----|-----|-----|-----|-----|-----|
| Modified dependence | 1%  | 1%  | 6%  | 90% | 6%  | 84% | 77% | 11% | 20% | 25% |
| Independence        | 99% | 0%  | 93% | 8%  | 93% | 3%  | 13% | 89% | 0%  | 55% |
| Social interaction  |     |     |     |     |     |     |     |     |     |     |
| Complete dependence | 0%  | 95% | 0%  | 16% | 1%  | 33% | 8%  | 3%  | 54% | 22% |
| Modified dependence | 3%  | 4%  | 7%  | 65% | 17% | 56% | 54% | 25% | 35% | 22% |
| Independence        | 97% | 1%  | 93% | 19% | 82% | 11% | 38% | 72% | 11% | 56% |

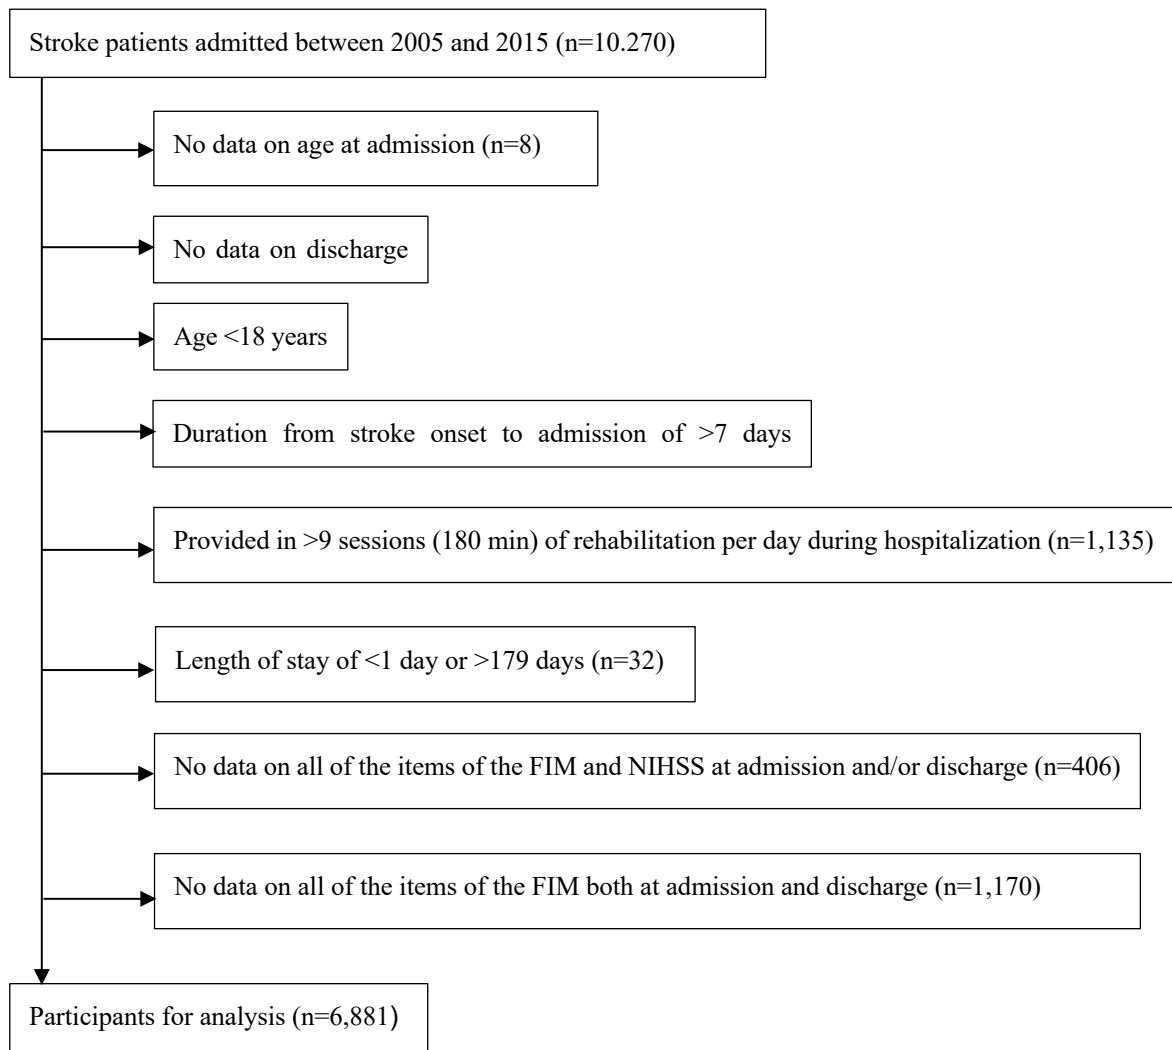

**Figure 1** Flow diagram of the patient selection process

The data source was the Japan Association of Rehabilitation Database
