# Supplementary material for: Prediction of Overall Patient Characteristics that Incorporate Multiple Outcomes in Acute Stroke: Latent Class Analysis
Source: bioRxiv or medRxiv preprint supplement (doi:10.1101/2023.05.24.23290504), 2023-06-02
Supplement: Supplementary file [file media-1.pdf]

**Table S1** Model fit of the prediction model

---

| <b>Classification Statistics</b>     |             |
|--------------------------------------|-------------|
| <b>Classification errors</b>         | 0.4362      |
| <b>Reduction of errors (Lambda)</b>  | 0.3924      |
| <b>Entropy R-squared</b>             | 0.4167      |
| <b>Standard R-squared</b>            | 0.3383      |
| <b>Classification log-likelihood</b> | -54800.7642 |
| <b>Entropy</b>                       | 8210.1485   |

---
