# Supplementary material for: Prediction of Overall Patient Characteristics that Incorporate Multiple Outcomes in Acute Stroke: Latent Class Analysis
Source: bioRxiv or medRxiv preprint supplement (doi:10.1101/2023.05.24.23290504), 2023-06-02
Supplement: Supplementary file [file media-2.pdf]

**Table S2.** Odds ratios (ORs) and p-values from the multivariate prediction of class membership (n=6,881)

|                                              | Class2             | Class3           | Class4          | Class5           | Class6             | Class7          | Class8              | Class9             | p-value |
|----------------------------------------------|--------------------|------------------|-----------------|------------------|--------------------|-----------------|---------------------|--------------------|---------|
|                                              | OR (95%CI)         | OR (95%CI)       | OR (95%CI)      | OR (95%CI)       | OR (95%CI)         | OR (95%CI)      | OR (95%CI)          | OR (95%CI)         |         |
| <b>Age</b>                                   | 1.2 (1.1 -1.2)     | 1 (1.0 -1.0)     | 1.1 (1.1 -1.1)  | 1.1 (0.9 -1.1)   | 1.1 (1.1 -1.1)     | 1 (1.0 -1.1)    | 1.1 (1.1 -1.1)      | 1.1 (1.1 -1.1)     | <0.001  |
| <b>Type of stroke</b>                        |                    |                  |                 |                  |                    |                 |                     |                    |         |
| Lacunar infarction                           | ref                | ref              | ref             | ref              | ref                | ref             | ref                 | ref                | <0.001  |
| Atherothrombotic cerebral infarction         | 1.7 (0.9 -3.3)     | 1.9 (1.3 -2.8)   | 1.1 (0.7 -1.7)  | 1.4 (0.4 -1.9)   | 1.2 (0.7 -2.0)     | 1.5 (0.9 -2.4)  | 1.6 (0.9 -2.9)      | 1.1 (0.6 -2.2)     |         |
| Cardiogenic embolism                         | 2.7 (1.4 -5.5)     | 1.3 (0.8 -2.1)   | 1.0 (0.6 -1.6)  | 1.0 (0.4 -1.5)   | 0.8 (0.5 -1.5)     | 2.8 (1.7 -4.8)  | 1.1 (0.6 -2.2)      | 1.6 (0.8 -3.2)     |         |
| Cerebral infarction (others/unknown)         | 3.0 (1.3 -7.0)     | 1.6 (1.0 -2.6)   | 1.4 (0.8 -2.5)  | 1.3 (0.3 -2.0)   | 1.6 (0.8 -3.2)     | 1.3 (0.7 -2.6)  | 1.6 (0.7 -3.3)      | 1.4 (0.5 -3.4)     |         |
| Hypertensive cerebral hemorrhage             | 2.9 (1.4 -5.9)     | 2.3 (1.4 -3.6)   | 1.9 (1.1 -3.2)  | 1.8 (0.2 -2.8)   | 2.2 (1.2 -3.9)     | 1.9 (1.0 -3.4)  | 2.4 (1.3 -4.5)      | 1.6 (0.8 -3.4)     |         |
| Cerebral hemorrhage (others/unknown)         | 4.3 (1.7 -10.8)    | 2.9 (1.4 -5.8)   | 2.8 (1.4 -5.8)  | 1.9 (0.1 -3.8)   | 2.1 (0.9 -4.9)     | 3.1 (1.5 -6.4)  | 3.0 (1.3 -6.9)      | 2.1 (0.7 -5.6)     |         |
| Subarachnoid hemorrhage                      | 0.2 (0.1 -0.6)     | 1.4 (0.7 -2.9)   | 0.4 (0.2 -0.9)  | 0.2 (0.7 -0.6)   | 0.2 (0.1 -0.5)     | 0.7 (0.3 -1.6)  | 0.1 (0.0 -0.4)      | 0.2 (0.1 -0.6)     |         |
| Others/Unknown.                              | 0.8 (0.1 -7.1)     | 0.7 (0.2 -2.3)   | 1.8 (0.5 -7.2)  | 1.2 (0.1 -4.1)   | 0.2 (0.0 -2.6)     | 1.3 (0.4 -5.0)  | 0.7 (0.1 -6.0)      | 0.1 (0.0 -1.3)     |         |
| <b>Righth Motor Arm of the NIHSS score</b>   |                    |                  |                 |                  |                    |                 |                     |                    |         |
| 0                                            | ref                | ref              | ref             | ref              | ref                | ref             | ref                 | ref                | <0.001  |
| 1                                            | 3.2 (1.9 -5.4)     | 2.3 (1.6 -3.3)   | 2.6 (1.8 -3.8)  | 2.1 (0.3 -2.9)   | 2.8 (1.8 -4.3)     | 1.6 (1.1 -2.5)  | 1.7 (1.0 -2.8)      | 2.1 (1.2 -3.8)     |         |
| 2                                            | 20.0 (9.4 -42.4)   | 6.3 (3.3 -12.1)  | 4.8 (2.3 -10.1) | 5.8 (0.0 -11.3)  | 8.6 (4.1 -18.0)    | 4.8 (2.3 -10.2) | 3.6 (1.4 -8.8)      | 9.7 (4.1 -22.5)    |         |
| 3                                            | 42.3 (18.3 -97.7)  | 4.6 (2.0 -10.8)  | 3 (1.1 -8.2)    | 5.3 (0.0 -11.8)  | 12.4 (5.3 -29.1)   | 3.9 (1.7 -8.9)  | 9.5 (3.9 -23.3)     | 20.4 (8.5 -48.9)   |         |
| 4                                            | 92.4 (36.9 -231.2) | 6.7 (2.6 -16.9)  | 7.8 (3.0 -20.3) | 6.5 (0.0 -16.5)  | 22.5 (8.9 -56.5)   | 6.3 (2.5 -16.2) | 18.8 (7.2 -48.9)    | 55.3 (21.8 -140.6) |         |
| <b>Left Motor Arm of the NIHSS score</b>     |                    |                  |                 |                  |                    |                 |                     |                    |         |
| 0                                            | ref                | ref              | ref             | ref              | ref                | ref             | ref                 | ref                | <0.001  |
| 1                                            | 2.6 (1.5 -4.3)     | 2.1 (1.5 -3.1)   | 1.6 (1.1 -2.4)  | 2.0 (0.3 -2.8)   | 2.4 (1.5 -3.8)     | 1.1 (0.7 -1.8)  | 4.6 (2.8 -7.6)      | 1.6 (0.9 -2.6)     |         |
| 2                                            | 24.1 (11.5 -50.7)  | 10.6 (5.5 -20.5) | 7.2 (3.5 -14.9) | 9.7 (0.0 -18.6)  | 21.1 (10.3 -43.4)  | 6.6 (3.2 -13.4) | 35.1 (16.9 -72.6)   | 7.6 (3.4 -17.2)    |         |
| 3                                            | 45.5 (20.5 -101.1) | 9.3 (4.4 -19.4)  | 7.8 (3.5 -17.5) | 14.4 (0.0 -29.3) | 58.2 (27.5 -123.4) | 2.6 (1.1 -6.0)  | 66.4 (31.9 -138.3)  | 3.5 (1.2 -9.9)     |         |
| 4                                            | 61.4 (27.6 -136.8) | 7.9 (3.5 -17.5)  | 6.4 (2.8 -14.6) | 9.6 (0.0 -23.1)  | 64.9 (29.8 -141.0) | 2.5 (1.1 -5.7)  | 107.9 (49.2 -236.7) | 1.4 (0.4 -4.7)     |         |
| <b>FIM eating</b>                            |                    |                  |                 |                  |                    |                 |                     |                    |         |
| Complete dependence                          | ref                | ref              | ref             | ref              | ref                | ref             | ref                 | ref                | <0.001  |
| Moderate dependence                          | 0.3 (0.1 -0.5)     | 1.7 (1.0 -2.7)   | 1.7 (1.1 -2.6)  | 1.8 (1.2 -2.7)   | 0.7 (0.4 -1.2)     | 2.4 (1.4 -4.1)  | 1.0 (0.6 -1.6)      | 1.0 (0.5 -1.8)     |         |
| Independence                                 | 0.1 (0.0 -0.2)     | 0.7 (0.5 -1.1)   | 0.6 (0.3 -0.9)  | 0.7 (0.5 -1.1)   | 0.2 (0.1 -0.3)     | 1.2 (0.7 -2.1)  | 0.3 (0.2 -0.4)      | 0.5 (0.2 -1.0)     |         |
| <b>FIM toileting</b>                         |                    |                  |                 |                  |                    |                 |                     |                    |         |
| Complete dependence                          | ref                | ref              | ref             | ref              | ref                | ref             | ref                 | ref                | <0.001  |
| Moderate dependence                          | 0.4 (0.2 -0.9)     | 0.6 (0.4 -0.9)   | 0.5 (0.3 -0.8)  | 0.6 (0.4 -0.9)   | 0.1 (0.0 -0.1)     | 0.9 (0.5 -1.4)  | 0.1 (0.0 -0.2)      | 0.2 (0.1 -0.4)     |         |
| Independence                                 | 0.3 (0.1 -1.0)     | 0.3 (0.2 -0.5)   | 0.1 (0.0 -0.2)  | 0.1 (0.1 -0.2)   | 0.0 (0.0 -0.1)     | 0.5 (0.3 -1.0)  | 0.0 (0.0 -0.2)      | 0.0 (0.0 -0.3)     |         |
| <b>FIM locomotion (wak/wheelchair)</b>       |                    |                  |                 |                  |                    |                 |                     |                    |         |
| Complete dependence                          | ref                | ref              | ref             | ref              | ref                | ref             | ref                 | ref                | <0.001  |
| Moderate dependence                          | 1.4 (0.6 -3.0)     | 0.6 (0.4 -0.8)   | 0.6 (0.4 -1.0)  | 0.4 (0.3 -0.6)   | 0.2 (0.1 -0.6)     | 1.2 (0.8 -1.9)  | 0.1 (0.0 -0.4)      | 1.0 (0.4 -2.4)     |         |
| Independence                                 | 0.8 (0.2 -3.5)     | 0.2 (0.1 -0.4)   | 0.0 (0.0 -3.1)  | 0.1 (0.1 -0.3)   | 1.5 (0.6 -4.0)     | 1.5 (0.7 -3.0)  | 0.3 (0.0 -1.6)      | 1.4 (0.1 -13.5)    |         |
| <b>FIM comprehension</b>                     |                    |                  |                 |                  |                    |                 |                     |                    |         |
| Complete dependence                          | ref                | ref              | ref             | ref              | ref                | ref             | ref                 | ref                | <0.001  |
| Moderate dependence                          | 0.0 (0.0 -0.1)     | 1.0 (0.4 -2.3)   | 0.7 (0.3 -1.3)  | 1.0 (0.4 -2.1)   | 0.7 (0.4 -1.5)     | 0.4 (0.2 -0.7)  | 1.1 (0.5 -2.5)      | 0.1 (0.1 -0.2)     |         |
| Independence                                 | 0.0 (0.0 -0.0)     | 0.6 (0.3 -1.4)   | 0.0 (0.0 -0.0)  | 0.5 (0.2 -1.0)   | 0.0 (0.0 -0.0)     | 0.0 (0.0 -0.0)  | 0.6 (0.3 -1.3)      | 0.0 (0.0 -0.0)     |         |
| <b>Amount of rehabilitation per day</b>      |                    |                  |                 |                  |                    |                 |                     |                    |         |
| Less than 2 units (40 minutes)               | ref                | ref              | ref             | ref              | ref                | ref             | ref                 | ref                | <0.001  |
| 2 or more to less than 4 units (80 minutes)  | 0.3 (0.2 -0.5)     | 1.4 (1.0 -1.9)   | 1.0 (0.7 -1.4)  | 1.3 (0.9 -1.7)   | 0.9 (0.6 -1.3)     | 1.6 (1.1 -2.3)  | 1.1 (0.7 -1.7)      | 1.0 (0.6 -1.6)     |         |
| 4 or more to less than 6 units (120 minutes) | 0.2 (0.1 -0.4)     | 0.7 (0.5 -1.1)   | 0.6 (0.4 -1.0)  | 0.6 (0.4 -0.9)   | 0.3 (0.2 -0.5)     | 1.3 (0.8 -2.1)  | 0.6 (0.3 -0.9)      | 0.7 (0.4 -1.3)     |         |
| 6 or more units                              | 0.3 (0.1 -0.4)     | 2.3 (1.4 -3.6)   | 2.0 (1.3 -3.2)  | 1.3 (0.9 -2.0)   | 0.8 (0.5 -1.3)     | 1.9 (1.2 -3.2)  | 1.0 (0.6 -1.7)      | 2.1 (1.1 -3.8)     |         |

Abbreviations: FIM, Functional Independence Measure (range, 18-126, higher = better); NIHSS, National Institutes of Health Stroke Scale (range, 0-42, higher = worse); CI, Confidence interval
